1 **BANCOVID, the first D614G variant mRNA-based vaccine candidate against SARS-**  
2 **CoV-2 elicits neutralizing antibody and balanced cellular immune response**

3 Juwel Chandra Baray, Md. Maksudur Rahman Khan, Asif Mahmud, Md. Jikrul Islam, Sanat  
4 Myti, Md. Rostum Ali, Md. Enamul Haq Sarker, Samir Kumar, Md. Mobarak Hossain  
5 Chowdhury, Rony Roy, Faqrul Islam, Uttam Barman, Habiba Khan, Sourav Chakraborty, Md.  
6 Manik Hossain, Md. Mashfiqur Rahman Chowdhury, Polash Ghosh, Mohammad Mohiuddin,  
7 Naznin Sultana\*, Kakon Nag\*

8 Globe Biotech Ltd., 3/Ka, Tejgaon I/A, Dhaka – 1208, Bangladesh,

9 \*, to whom correspondence should be made.

10 E-mail: kakonpoly@yahoo.com, kakonpoly@gmail.com

11

12

13 Key words: COVID, Coronavirus, Lipid nanoparticle, LNP, Vaccination, Immunization,

14

15

16 **Abstract**

17 Effective vaccine against SARS-CoV-2 is the utmost importance in the current world. More  
18 than 1 million deaths are accounted for relevant pandemic disease COVID-19. Recent data  
19 showed that D614G genotype of the virus is highly infectious and responsible for almost all  
20 infection for 2<sup>nd</sup> wave. Despite of multiple vaccine development initiatives, there are currently  
21 no report that has addressed this critical variant D614G as vaccine candidate. Here we report  
22 the development of an mRNA-LNP vaccine considering the D614G variant and  
23 characterization of the vaccine in preclinical trial. The surface plasmon resonance (SPR) data  
24 with spike protein as probe and competitive neutralization with RBD and S2 domain revealed  
25 that immunization generated specific antibody pools against the whole extracellular domain  
26 (RBD and S2) of the spike protein. The anti-sera and purified IgGs from immunized mice on  
27 day 7 and 14 neutralized SARS-CoV-2 pseudovirus in ACE2-expressing HEK293 cells in a  
28 dose dependent manner. Importantly, immunization protected mice lungs from pseudovirus  
29 entry and cytopathy. The immunologic responses have been implicated by a balanced and

30 stable population of CD4<sup>+</sup> cells with a Th1 bias. The IgG2a to IgG1 and (IgG2a+IgG2b) to  
31 (IgG1+IgG3) ratios were found 1±0.2 and 1.24±0.1, respectively. These values are  
32 comparatively higher than relevant values for other published SARS-CoV-2 vaccine in  
33 development,<sup>1,2</sup> and suggesting higher viral clearance capacity for our vaccine. The data  
34 suggested great promise for immediate translation of the technology to the clinic.

## 35 **Introduction**

36 A new infectious corona virus (SARS-CoV-2) has been first reported from Wuhan, China in  
37 December, 2019 that causes COVID 19.<sup>3</sup> The World Health Organization (WHO) declared the  
38 COVID-19 a global public health emergency situation on February 5, 2020 after getting  
39 growing evidence of continuous person-to-person transmission.<sup>4</sup> The virus has been spread  
40 worldwide quickly, and consequently WHO has declared it pandemic in March 11, 2020. As  
41 of September 29, 2020, the pandemic has resulted in 1,007,887,415 deaths among over  
42 33,630,004 patients in 215 countries, with a case-fatality rate of 3%.

43 There will be a risk of pandemic as long as there is COVID-19 epidemic situation in any area  
44 of the world unless people are properly vaccinated. Therefore, effective vaccines against  
45 SARS-CoV-2 are immediately required to control morbidity and mortality related with  
46 COVID-19. Generally, non-replicating viral vectors, inactivated virus, DNA-based and  
47 protein-based vaccines have been the major approaches for the development of stable and  
48 effective vaccines; though they have their inherent limitations.<sup>5</sup> Recently, mRNA-based  
49 vaccines have become a promising approach because of their opportunity for rapid  
50 development, comparative low dose, logical better safety profile, and low capital expenditure  
51 (CAPEX).<sup>6</sup> Several other leading vaccines under development against SARS-CoV-2 are also  
52 mRNA-based.<sup>2,7,8,9</sup> Lipid nanoparticle technology has been developed for effective delivery of  
53 single-stranded therapeutics like siRNA, antisense oligo, mRNA etc. The first RNA-LNP

54 therapeutic was approved in 2018 and has set the example for clinical safety of LNP-formulated  
55 RNA.<sup>10</sup> Therefore, we have also opted for mRNA-based LNP-mediated vaccine development  
56 technology to support the initiative for preventing the ongoing wave of the COVID-19  
57 pandemic.

58 The candidate mRNA vaccine ‘BANCOVID’ is a LNP-encapsulated, nucleoside-modified  
59 mRNA-based vaccine that encodes the SARS-CoV-2 spike (S) glycoprotein stabilized in its  
60 prefusion conformation. Coronaviruses have genetic proofreading mechanisms, and SARS-  
61 CoV-2 sequence diversity is comparatively low;<sup>11,12</sup> though, natural selection can adopt rare  
62 but favorable mutations. Since the outbreak in China, SARS-CoV-2 has gone through  
63 numerous mutations. Among these, the D614G amino acid change in the spike protein of  
64 Wuhan reference strain is caused by an A-to-G nucleotide substitution at position 23,403 of the  
65 relevant nucleotide sequence. Currently, D614G is the most prevalent circulating isotype of  
66 SARS-CoV-2 worldwide (more than 95%).<sup>13,14</sup> To date, there is no published report about the  
67 D614G-relevant vaccine development. Few studies have shown that antibody generated using  
68 D614 variant-target did not show significant difference between D614 and G614 variants in  
69 terms of cellular entry.<sup>15</sup> These studies did not use G614-specific antibody, and applied  
70 artificial systems for characterizing relevant functional experiments. Furthermore, how G614  
71 variant vaccine behave in immunization and what would be the impact of relevant antibody on  
72 SARS-CoV-2 is not known. Therefore, developing of G614 variant-specific vaccine is a prime  
73 importance, and warrant characterization. To address this, we have incorporated D614G  
74 variant-targeted nucleic acid sequence, as well as few other immunogen-enhancing aspects in  
75 our mRNA design consideration. In this study, we described the design and preclinical  
76 characterization of ‘BANCOVID’ mRNA-LNP vaccine candidate.

77

## 78 **Materials and Methods**

## 79 **Target gene and vector cloning**

### 80 *Target selection*

81 As of March 27, 2020, there were 170 surface glycoproteins (partial and complete sequence)  
82 out of 1661 SARS-CoV-2 proteins posted on NCBI Virus database. A comparative sequence  
83 alignment using Clustal Omega (<https://www.ebi.ac.uk/Tools/msa/clustalo/>) showed  
84 differences in several regions, notably in position 614 (D>G). A total of 15 glycine containing  
85 surface glycoprotein were found instead of aspartic acid. A consensus sequence from multiple  
86 sequence alignment was identified (data not shown) using EMBOSS Cons  
87 ([https://www.ebi.ac.uk/Tools/msa/emboss\\_cons/](https://www.ebi.ac.uk/Tools/msa/emboss_cons/)) and selected as primary target sequence for  
88 vaccine development. Hydrophilicity/hydrophobicity plot analysis was performed using  
89 GENETYX Ver8.2.0, protein 3D modeling using Phyre2<sup>16</sup> and visualized using UCSF Chimera  
90 1.11.2rc.<sup>17</sup> Finally, D614G mutation and double proline (2P) mutations (K986P and V987P)  
91 were incorporated to the target sequence.

### 92 *Target amplification*

93 Nasopharyngeal and oropharyngeal swab sample were collected from a COVID-19 positive  
94 male patient. Virus heat inactivation at 56 °C for 30 minutes and total RNA including virus  
95 RNA extraction was performed using TRIzol™ Plus RNA Purification Kit (ThermoFisher,  
96 USA). cDNA synthesis was performed using GoScript™ Reverse Transcription System  
97 (Promega, USA). S-gene (Surface glycoprotein) was amplified using 3 different sets of  
98 primers, 0572F and 0573R, 0574F and 0575R, 0576F and 0577R, respectively (supplementary  
99 table 1) and Platinum™ SuperFi™ DNA Polymerase (ThermoFisher, USA). Amplified S-gene  
100 and polymerase chain reaction (PCR) engineered pET31b(+) (Novagen, Germany) bacterial  
101 expression vector were amplified using 0570F and 0571R primers, excised and extracted from  
102 agarose gel using GeneJET Gel Extraction and DNA Cleanup Micro Kit (ThermoFisher, USA),

103 and assembled together using NEBuilder® HiFi DNA Assembly Master Mix (NEB, USA).  
104 Sub-cloning was performed into DH5alpha chemical competent cells, miniprep purification  
105 was using PureLink™ Quick Plasmid Miniprep Kit (ThermoFisher, USA). S-gene integration  
106 check into vector was performed via restriction digestion using XbaI (ThermoFisher, USA)  
107 and EcoRI (ThermoFisher, USA), and PCR using primers 0600F and 0024R (supplementary  
108 table. 1). DNA sequencing was performed to confirm the complete open reading frame (ORF)  
109 compatibility of target S-gene. Finally, sequence confirmed rDNA (rDNA ID: p20004,  
110 supplementary figure 2) was further amplified and purified using PureLink™ HiPure Plasmid  
111 Midiprep Kit (ThermoFisher, USA), sequenced, and stored for future purposes. Also, sequence  
112 confirmed S-gene was submitted to NCBI (GenBank accession number MT676411.1), where  
113 we identified and noted D614G mutation. Supplier's manual with minor modifications were  
114 followed for all the methods.

#### 115 *Target modification*

116 An immunoglobulin (Ig) heavy chain (HC) 19 amino acid signal peptide (H1)<sup>18</sup> was assembled  
117 (0583F, 0584R, 0585F and 0586R), and amplified (0583F and 0586R) along with homology  
118 arm for incorporating into rDNA p20004, replacing native 13 amino acid leader sequence.  
119 Assembled signal peptide was amplified with homology arm and rDNA p20004 was  
120 engineered via PCR using 0582F and 0571R primers (supplementary table 1 for assembly and  
121 amplification primers). New rDNA p20006 (data not shown) was prepared by incorporating  
122 signal peptide and engineered p20004 rDNA, using above explained method as p20004 rDNA  
123 preparation.

124 S-gene was amplified from rDNA p20006 using 0594F and 0592RR primers (supplementary  
125 table 1). This gene and pcDNA™5/FRT Mammalian Expression Vector (ThermoFisher, USA)  
126 were digested using Acc65I (ThermoFisher, USA) and XhoI (ThermoFisher, USA) and

127 visualized via agarose gel electrophoresis. The desired bands from the gel were excised and  
128 purified using GeneJET Gel Extraction and DNA Cleanup Micro Kit and ligated using T4 DNA  
129 Ligase (ThermoFisher, USA). After ligation, sub-cloning into DH5 $\alpha$  chemical competent cells,  
130 plasmid miniprep purification, insert checking, DNA sequencing, plasmid midiprep  
131 purification, DNA sequencing and storage (rDNA ID: p20010, data not shown) were  
132 performed.

133 2P (double Proline) amino acid mutations at position 986 (K986P) and 987 (V987P) were also  
134 performed via site directed mutagenesis using 0745F and 0745R primers (supplementary table  
135 1). DNA sequencing was performed to confirm desired mutations (rDNA ID: p20015, data not  
136 shown).

137 Finally, a T7 promoter sequence, a synthetic 5'-UTR, an IgE signal peptide replacing native  
138 13 amino acids signal peptide from S-gene, a 3'-UTR (modified alpha globin and modified  
139 beta globin), and a 130 bp synthetic poly A-tail (pA-tail) were added. A restriction  
140 endonuclease (Sfo I) sequence before T7 promoter sequence and after pA were added for  
141 cutting out desired size of DNA for in-vitro mRNA synthesis. Final rDNA ID was p20020  
142 (Supplementary figure 2) and rDNA construction was performed as mentioned before, same as  
143 p20004 and p20006 (supplementary figure 2). Supplier's manual with minor modifications  
144 were followed for all the methods.

#### 145 *Sequencing*

146 DNA sequencing was performed as according to supplier's protocol for the final construct  
147 p20020 and other constructs e.g., p20004, p20006, p20010, p20015 etc. (supplementary table  
148 2 for sequencing primers) using 3500 Genetic Analyzer (ThermoFisher, USA). DNA  
149 sequencing data clearly confirmed the presence of the target sequences and modifications.

150 BigDye® Terminator v1.1 Cycle Sequencing Kits (ThermoFisher, USA) and POP-6 polymer  
151 (ThermoFisher, USA) chemistry was used for DNA sequencing reaction.

## 152 **mRNA production**

### 153 *mRNA synthesis*

154 The in-vitro (IVT) mRNA synthesis reaction was performed using MEGAscript™ T7  
155 Transcription Kit (ThermoFisher, USA), and Ribonucleotide Solution Set (NEB, USA). During  
156 development phase, IVT mRNA synthesis reaction was optimized into 4 steps (supplementary  
157 method 1). In optimized IVT mRNA reaction, final concentration of ribonucleotides was as  
158 follow: ATP and UTP – 13.13 mM, and GTP and CTP – 9.38 mM. The reaction was run for 2  
159 hours at 37 °C. IVT reaction was followed by a DNase treatment at 37 °C for 15 minutes using  
160 TURBO DNase from the transcription kit.

### 161 *mRNA capping and purification*

162 mRNA capping reaction was performed with purified IVT mRNA using 3'-O-Me-  
163 m7G(5')ppp(5')G RNA Cap Structure Analog (NEB, USA). The reaction condition was  
164 followed according to supplier's manual. During development phase, IVT mRNA was purified  
165 via protein degradation by phenol:chloroform:isoamyl alcohol, phenol removal by chloroform  
166 (twice), and final purification using MEGAclean™ Transcription Clean-Up Kit (ThermoFisher,  
167 USA). Capped mRNA purification was performed using the same cleanup kit. Supplier's  
168 instructions were followed during the purification steps. Purified IVT mRNA and capped  
169 mRNA were quantified using Multiskan GO spectrophotometer (ThermoFisher, USA).

## 170 **Formulation of mRNA**

### 171 *mRNA-LNPs formation*

172 Purified mRNAs were first diluted with sodium acetate buffer at desired concentration. The  
173 lipid molecules were dissolved in ethanol and mixed well. Lipids (MC3: DSPC: Cholesterol:  
174 DMG-PEG2000) were combined in the molar ratio of 50:10:38.5:1.5.<sup>19,20, 21,22</sup> Then, sodium  
175 acetate buffer containing mRNA and lipid sample were mixed at a ratio of 3:1 and passed  
176 through the liposome extruder (Genizer, USA) to encapsulate the mRNA. The size distribution  
177 was checked after encapsulation of mRNA into nanoparticles. Then the formulations were  
178 dialyzed against 50 mM HEPES/sodium acetate buffer and phosphate-buffered saline for 18  
179 hours. The size distribution was again checked after dialysis by Zetasizer Nano ZSP (Malvern,  
180 USA). LNP samples were analyzed for size distribution in 1× phosphate buffered saline (PBS)  
181 as dispersant. The formulation was concentrated using Ultra centrifugal filters (Merck,  
182 Germany), filtered through 0.22 micron filter, and stored at 5±3 °C.<sup>23</sup> The formulation was  
183 passed through the quality control for the particle size, encapsulation efficiency, endotoxin  
184 limit and sterility.

### 185 **Safety and efficacy in mice**

186 A total number of 50 BALB/c swiss albino mice (male and female) of 6-8 weeks old, were  
187 selected randomly and isolated 5 days before immunization. After careful observation and  
188 conditioning, 30 mice (15 males and 15 females) were taken to the experiment room for  
189 immunization and subsequent safety and efficacy analysis. 9 male mice were also separated for  
190 local tolerance testing. The temperature in the experimental animal room was 26 °C (±2 °C)  
191 and the relative humidity was 60±5%. The room was HVAC controlled ISO class 7 room with  
192 70% fresh air intake and full exhaust. The mice were individually housed in polypropylene  
193 cage with individual water bottle, provided with 5 g of in-house mouse feed daily and kept  
194 under 12 hours of day-night cycle. 30 mice were separated into 5 different groups consisting 6  
195 mice (3 males and 3 females) in each group. There were 3 different treatment groups such as  
196 Treatment group 1, 2, and 3, 1 placebo group and 1 control group. Each mouse of treatment



197 groups 1, 2, and 3 was immunized with sterile 0.1 µg/50 µL, 1.0 µg/50 µL and 3.0 µg/50 µL  
198 of BANCOVID, respectively. Each mouse of the placebo group was injected with the vehicle  
199 only and the control group mice were not injected with anything. Intramuscular (IM) injection  
200 in the left quadriceps was done for immunization. The flow of the experimental design is  
201 shown in supplementary figure 3. The study plan and procedures were approved by the internal  
202 ethical review board, which is complied with local ethical regulation. No treatment  
203 randomization and blinding methods were used in the study and sample sizes were determined  
204 by the resource equation method.

#### 205 *Local tolerance*

206 Local tolerance was confirmed by clinical signs, macroscopic and histopathology evaluations  
207 of injection sites in animals. 9 male mice were separated for local tolerance study and divided  
208 into 3 different groups consisting of 3 male mice in each group. There was 1 treatment group,  
209 1 placebo group and 1 control group for the study. The treatment group was immunized with  
210 IM injection with 3.0 µg/50 µL of BANCOVID in the left quadriceps muscle whereas the  
211 placebo group was injected with 50 µL of vehicle and the control group with 50 µL of normal  
212 saline. Euthanasia and evaluation of lesions was performed in one representative mouse from  
213 placebo and control group and 3 from the treatment group at 48 hours post treatment. The inner  
214 thigh muscle of injected site of each mouse was excised and placed in 10% neutral buffered  
215 formalin until adequately fixed. After trimming, processing and paraffin embedding, the  
216 sections are HE stained and observed for erythema and edema under microscope.

#### 217 *Immunogenicity*

218 The immunogenicity of BANCOVID was evaluated in BALB/c mice, post administration to  
219 the quadriceps muscle. Approximately 200 µL blood was collected from facial vein and  
220 centrifuged at 1500 X g for serum isolation (10 minutes at 4 CC). All serums were aliquot,

221 frozen immediately and stored at -80 °C until analysis. The reactivity of the sera from each  
222 group of mice immunized with BANCOVID was measured against SARS-CoV-2 S antigen  
223 (SinoBiologicals, China). Analysis revealed IgG binding against SARS-CoV-2 S protein  
224 antigens in the sera of the immunized mice. The serum IgG binding endpoint titers (EPTs) were  
225 measured in mice immunized with BANCOVID. EPTs were observed in the sera of mice at  
226 day 7 and day 14 after immunization with a single dose of the vaccine candidate.

### 227 *Toxicity*

228 Pre-immune whole blood (approximately 50 µL) from each mouse was collected for complete  
229 blood count (CBC) in 2% EDTA at 3 days before immunization. Similarly, whole blood was  
230 also collected after immunization at day 14 for CBC analysis using auto hematology analyzer  
231 BK-6190-Vet (Biobase, China). Pre-immune serum of 3 days before and 14 days after  
232 immunization were used for chemistry analysis using semi-automatic chemistry analyzer  
233 (Biobase, China) such as alanine transferase (ALT), aspartate transaminase (AST) and blood  
234 nitrogen urea (BUN).

### 235 **Neutralization assay**

#### 236 *Pseudovirus preparation*

237 Pseudotyped SARS-CoV-2 adeno virus was prepared expressing the SARS-CoV-2 surface  
238 glycoprotein gene (S gene) on the virus. S gene of SARS-CoV-2 was cloned into pAADV-B02  
239 vector (Genemedi, China) that also contains a GFP gene downstream of the gene of interest.  
240 After construction, SARS-CoV-2 S gene containing plasmid p20017 and adenovirus backbone  
241 plasmid pAADV-C01 (Genemedi, China) were co-transfected into HEK293 based adapted  
242 viral production cell (ThermoFisher, USA). Viral production cells were seeded in a 6 well TC  
243 treated plate (Nest, China) at a concentration of  $6 \times 10^5$  cell per well and cultured overnight.

244 Then co-transfection was performed using Lipofectamine 3000 (ThermoFisher, USA) reagent  
245 according to manufacturer's protocol. Next day 1.25% low melting agarose in DMEM media  
246 was spread on the well and incubated until plaques were formed. After formation of plaques,  
247 multiple plaques were collected in DMEM media and titers were measured for plaque selection.  
248 Then selected plaque was added on the fresh pre seeded viral production cell. After few days,  
249 cells and supernatant were collected and performed repeated freeze thawing for collection of  
250 viruses (P1 pseudovirus). Similarly, infection was performed on fresh cells and virus was  
251 collected (P2 pseudovirus). These processes were repeatedly performed and P4 pseudoviruses  
252 were collected. After collection of P4 pseudoviruses, concentration and purification was  
253 performed by ultracentrifugation and sucrose gradient.<sup>24</sup> After titer determination,  
254 pseudoviruses were stored at -86 °C freezer (ThermoFisher, USA).

255 Another Pseudotyped SARS-CoV-2 retro virus was prepared that virus have SARS-CoV-2  
256 surface glycoprotein gene (S gene). S gene was cloned into pMSCV\_Neo vector (TakaRa Bio,  
257 USA) that vector have no GFP or luciferase reporter gene. After preparation of S gene contain  
258 plasmid p20012 (supplementary figure 2D), co-transfection was performed into viral  
259 production cell. pMD2G and pSPAX2 (Genemedi, China) packaging plasmid were used for  
260 retro based pseudovirus preparation.  $9 \times 10^6$  cells were seeded in a 75 cm<sup>2</sup> tissue culture treated  
261 flask and cultured overnight. Then co-transfection was performed using Lipofectamine 3000  
262 reagent as according to manufacturer's protocol. After 6 hours of incubation, media was  
263 replaced with complete DMEM media. After 48 hours, media was collected and store it 4 °C.  
264 Additional 12 mL media was added into the flask and next day media was collected and  
265 combined with previously stored media. Then concentration and purification were performed  
266 by ultracentrifugation.<sup>24</sup> After titer determination, pseudoviruses were stored at -86 °C freezer  
267 (ThermoFisher, USA).

268 *In-vitro neutralization*

269 ACE2 overexpressing HEK293 cell (Innoprot, Spain) were seeded in a two 96 well TC treated  
270 plate at a concentration of  $2.2 \times 10^4$  cells per well and overnight incubation was performed.  
271 One plate for adeno based pseudovirus and other plate for retro based pseudovirus. Two  
272 separate plate were used for serum preparation. Different rows of the plate were used for  
273 different group, such as A1- A10 for treatment group, B1-B10 for placebo, C1-C10, D1-D10  
274 E1-E10 and F1-F10 for control, CR3022, commercial anti spike and only cell group. High  
275 concentration of CR3022, in-house developed, was used in these experiments. Sera from  
276 different mice of same group were collected and pool these sera for neutralization assay. 10  $\mu$ L  
277 sera from vaccinated mice was added in 90  $\mu$ L complete DMEM media. Then the serum was  
278 2-fold serially diluted in complete DMEM media. For serum collected from different mice  
279 group, initial dilution was 10-fold with nine times 2-fold dilution. After completion of the  
280 serum dilution,  $1.2 \times 10^5$  pseudovirus in 50  $\mu$ L was added into different wells that contained  
281 serially diluted serum and mixed properly. The SARS-CoV-2 pseudovirus and serum mixture  
282 was incubated for 1.5 hour at 37 °C. After incubation, 100  $\mu$ L of pseudovirus and serum  
283 mixture was transferred on pre seeded cells. 5  $\mu$ g/mL poly L- lysine (Wako, Japan) was added  
284 into each well for enhancing the transduction. Then, incubation was performed at 37 °C for 48  
285 hours and after that readings for GFP fluorescence intensity were taken using Varioskan LUX  
286 (ThermoFisher, USA) machine. Number of virus particle inside the cells were determined by  
287 qPCR. After fluorescence analysis, media was removed and collected cells. Then heat  
288 inactivation was performed at 56 °C for 30 minutes. Cell was lysed and qPCR performed  
289 according to SYBR Green technology. In these experiment five wells from each group were  
290 selected and analyzed.

291 For retro based neutralization assay, qPCR was used to analyzed the copy number of S gene  
292 that integrated into cell. Copy number of S gene indicated the entry of pseudovirus into cell.  
293 Genomic DNA was extracted by MagMAX Express-96 Standard (ThermoFisher, USA) using

294 Magmax DNA multi-sample ultra-kit. (ThermoFisher, USA). These genomic DNA was used  
295 for determination of S gene copy number by qPCR.

### 296 *In-vivo neutralization*

297 A total number of 18 albino male mice of 6-8 weeks were selected and isolated for the analysis.  
298 These mice were divided into 6 groups, 1 control and 5 treatment, comprising of 3 male mice  
299 in each group. The control group mice were immunized with 50  $\mu$ L of placebo and treatment  
300 group mice were immunized with 1  $\mu$ g/50  $\mu$ L of BANCOVID vaccine. GFP Pseudotyped  
301 SARS-CoV-2 adeno virus (or treated as indicated in Figure: 6) were sprayed in the nasopharynx  
302 on 21-day post immunization. Nasopharynx and lung aspirate samples from mice were  
303 collected and analyzed for virus copy number using qPCR at indicated time point. Animals  
304 were sacrificed and lung section was performed and microscopic slides were prepared for  
305 fluorescence imaging (GFP) to detect virus load.

### 306 **Analysis**

#### 307 *mRNA amplification*

308 Purified mRNA, capped mRNA (vaccine candidate API), formulated LNPs and RNase treated  
309 formulated LNPs samples were used for mRNA amplification. RT-qPCR technique was  
310 performed according to GoTaq<sup>®</sup>1-Step RT-qPCR (Promega, USA) kit instructions. Primers,  
311 0751F and 0752R, used are shown in supplementary table 3. Reverse transcription was done  
312 at 37 °C for 15 minutes then hold for 10 minutes at 95 °C for reverse transcriptase inactivation  
313 and GoTaq<sup>®</sup> DNA Polymerase activation. Denaturation was done at 95 °C for 10 seconds,  
314 annealing at 44 °C for 30 seconds, extension at 68 °C for 30 seconds for 40 cycles. After  
315 completion of PCR cycle, melt curve was done for sample integrity checking.

#### 316 *mRNA identification*

317 Capped mRNA, purified mRNA, formulated LNPs and formulated LNPs, treated with RNase  
318 samples, were analyzed by size exclusion chromatography (SEC). SEC was performed in  
319 Ultimate 3000 (ThermoFisher, USA) system using 10 mM Disodium hydrogen phosphate  
320 (Wako, Japan), 10 mM Sodium dihydrogen phosphate (Wako, Japan), 100 mM Sodium  
321 chloride (Merck, Germany), pH 6.6 as mobile phase. Biobasic SEC-300 (300 x 7.8 mm, particle  
322 size; 5 µm, ThermoFisher, USA) column was used with 1.0 mL/minute flow rate, 260 nm  
323 wavelength, 10 µL sample injection volume for 20 minutes.

## 324 **Humoral immunogenicity**

### 325 *Titer Analysis by ELISA*

326 Serum from the mice of different groups were analyzed by enzyme-linked immunosorbent  
327 assay (ELISA) to determine sera antibody titers. ELISA plate (Corning, USA) was coated with  
328 1µg/mL SARS-CoV-2 Spike S1+S2 ECD-His recombinant protein (Sino Biological, China) in  
329 Dulbecco's phosphate-buffered saline (DPBS) (ThermoFisher, USA) for 2 hours at room  
330 temperature. Plate was washed for three time with DPBS + 0.05 % Tween 20 (Scharlau, Spain)  
331 and then blocked with PBS + 1 % BSA (ThermoFisher, USA) + 0.050 % Tween-20 for 2 hours  
332 at 37 °C. The plate was washed for 3 times then incubated with mouse sera and SARS-CoV-2  
333 Spike antibody (Sino Biological, China) for 2 hours at 37 °C. After washing for 3 times, the  
334 plate was again incubated with Goat anti-Mouse IgG (H+L) Secondary Antibody, HRP  
335 conjugate (ThermoFisher, USA) for 50 minutes at room temperature. Final washing was done  
336 for 3 times and then developed the colorimetric reaction with Pierce TMB substrate  
337 (ThermoFisher, USA) for 10 minutes. The reaction was stopped with 1N hydrochloric acid  
338 (HCl) and the plate was read at 450 nm wavelength within 30 minutes.

### 339 *Isotyping analysis by ELISA*

340 For isotype analysis, Pierce Rapid ELISA Mouse mAb Isotyping kit (ThermoFisher, USA) was  
341 used. Serum samples from 4 subjects of treatment 2 and 3 were analyzed. All the steps were  
342 followed as per supplier's instructions.

### 343 *Antibody binding affinity by SPR*

344 The BIAcore T200 equipment (GE Healthcare, USA) and Amine coupling kit (GE Healthcare,  
345 USA) were used for immobilization of SARS-CoV-2 Spike S1+S2 ECD-His recombinant  
346 protein (Sino Biological, China) in Series S Sensor Chips CM5 (GE Healthcare, USA). First  
347 the flow cell surface of Series S Sensor Chips CM5, was activated by injecting a mixture of  
348 EDC/NHS (1:1) for 7 minutes. Then 70  $\mu\text{L}$  of 50  $\mu\text{g}/\text{mL}$  S1+S2 protein was prepared in sodium  
349 acetate at pH 5.0 and injected over the activated surface at 10  $\mu\text{L}/\text{min}$  flow rate. Residual NHS-  
350 esters were deactivated by a 70  $\mu\text{L}$  injection of 1 M ethanolamine, pH 8.5. The immobilization  
351 procedure was performed by using running buffer HBS-EP, pH 7.4 (GE Healthcare, USA).

352 5 samples containing 1  $\mu\text{L}$  mouse serum each were analyzed using surface plasmon resonance  
353 (SPR) technology to analyze the binding affinity of the antibody pool. The first, second, third,  
354 fourth and fifth samples were 1  $\mu\text{L}$  of pre-immune mouse serum, 1  $\mu\text{L}$  of MabSelect resin (GE  
355 Healthcare, USA) pulldown mice serum after 14 days of immunization, 1  $\mu\text{L}$  resin pulldown  
356 mice serum with 0.5  $\mu\text{L}$  of 500  $\mu\text{g}/\text{mL}$  of SARS-CoV-2 Spike S1+S2 ECD-His recombinant  
357 protein, 1  $\mu\text{L}$  of resin pulldown mice serum with 0.5  $\mu\text{L}$  of 500  $\mu\text{g}/\text{mL}$  SARS-CoV-2 Spike  
358 RBD-His recombinant protein, and 1  $\mu\text{L}$  of resin pulldown mice serum with 0.5  $\mu\text{L}$  of 500  
359  $\mu\text{g}/\text{mL}$  SARS-CoV-2 Spike S2 ECD-His recombinant protein, respectively. These samples

360 were flown through over the active flow cell surface of CM5 chip for binding analysis. Glycine-  
361 HCl of pH 2.5 was used for regeneration. All samples were diluted in 1 x HBS-EP at pH, 7.4  
362 running buffer.

### 363 **Cellular immunogenicity**

#### 364 *SARS-CoV-2 surface glycoprotein peptide mapping*

365 SARS-CoV-2 Spike S1+S2 ECD His recombinant protein (Sino Biological, China), S2 ECD-  
366 His Recombinant Protein (Sino Biological, China), and RBD-His Recombinant Protein (Sino  
367 Biological, China) were digested and purified according to ThermoFisher Pierce Trypsin  
368 Protease, MS grade instructions (supplementary method 2). 1 µg of digested peptides were  
369 loaded into mass spectrometry system (Q Exactive Hybrid Quadrupole-Orbitrap MS  
370 manufactured by ThermoFisher Scientific, USA). For separation of peptides Hypersil gold C18  
371 (100x2.1 mm; particle size: 1.9 µm, ThermoFisher, USA) column was used. Column oven  
372 temperature was set at 40 °C and eluted in 5 – 40 % mobile phase B (0.1 % formic acid in  
373 acetonitrile) and 95– 60 % mobile phase A (0.1% formic acid in water) gradient with 0.300  
374 mL/min flow rate for 65 minutes. Peptide elution were checked by UV absorbance at 214 nm.  
375 For peptide identification, data dependent mass spectrometry was performed where full-MS  
376 scan range was 350 m/z to 2200 m/z, resolution was 70,000, AGC target was 3E6, maximum  
377 IT was 100 milliseconds (ms), and data dependent mass spectrometry resolution was 17,500,  
378 AGC target was 1E5, maximum IT was 100 ms. After getting raw data from mass spectrometry  
379 system, data analysis was performed in BioPharma Finder (ThermoFisher, USA) using variable  
380 parameters to get confident data, and then data were combined in one map to visualize complete  
381 fragmentation (supplementary figure 6).



382 On the other hand, full length SARS-CoV-2 surface glycoprotein was digested computationally  
383 (ExPASy PeptideMass: [https://web.expasy.org/peptide\\_mass/](https://web.expasy.org/peptide_mass/)) via trypsin (supplementary  
384 figure 7).

385

386 *Mouse splenocyte isolation, peptide stimulation and Flow cytometric analysis of T cell (CD4<sup>+</sup>)*  
387 *populations*

388 Male and female BALB/c swiss albino mice were sacrificed and splenocyte were harvested  
389 using in-house developed method (supplementary method 3). Harvested splenocyte were RBC  
390 lysed and cultured at 37°C and 5% CO<sub>2</sub> using RPMI complete media where sacrificed mice  
391 sera were used instead of fetal bovine serum (FBS). A time-lapse video at 40X magnification  
392 for splenocyte was captured after 24 hours of culture. Isolated splenocytes from mice were  
393 either stimulated with S-peptide pool or buffer. After 6 hours, media were collected, cells were  
394 washed twice with PBS and incubated for 12 hours. This samples were considered as 18 hours'  
395 sample. Samples were collected again for cytokine secretion assay and cells were processed  
396 for Flow cytometric analysis of T cell populations. Intracellular cytokine staining of cells were  
397 stained with following antibodies with maintaining supplier's instructions: V500 anti-mouse  
398 CD45 (BD Bioscience, USA), FITC anti-mouse CD4 (ThermoFisher, USA), anti-mouse IL-2  
399 (ThermoFisher, USA), Alexa Fluor® 594 conjugate secondary antibody (ThermoFisher, USA),  
400 anti-mouse IL-6 (ThermoFisher, USA), Alexa Fluor® 594 conjugate secondary antibody  
401 (ThermoFisher, USA), in-house developed TNF alpha fusion protein, anti Fc primary antibody  
402 (ThermoFisher, USA), Alexa Fluor® 594 conjugate secondary antibody (ThermoFisher, USA)  
403 and no live/dead staining was used. Cells were washed, fixed, stained and stored at 4 °C. After  
404 48 hours, cell events were acquired using an FACS Lyric (BD Biosciences), followed by  
405 FlowJo software (FlowJo LLC, Ashland, OR) analysis (supplementary figure 8, 9, 10).

406 *IL-2 and Il-6 titer*

407 ELISA plate (Corning) was coated with 1µg/mL IL-2 polyclonal antibody (ThermoFisher,  
408 USA) in Dulbecco's phosphate-buffered saline (DPBS) (ThermoFisher, USA) for 2 hours at  
409 room temperature. After coating, Plate was washed for 3 times with DPBS + 0.05 % Tween 20  
410 (Scharlau, Spain) and then blocked with PBS + 1 % BSA (ThermoFisher, USA) + 0.050 %  
411 Tween 20 for 2 hours at 37 °C. After blocking, Plate was washed for 3 times and incubated  
412 with IL-2 and mouse splenocyte samples for 2 hours at 37 °C. Plate was then washed again and  
413 incubated with IL-2 monoclonal antibody (ThermoFisher, USA) for 2 hours at 37 °C. After  
414 washing for 3 times, the plate was again incubated with Goat anti-Mouse IgG (H+L) Secondary  
415 Antibody, HRP conjugate (ThermoFisher, USA) for 50 min at room temperature. Final  
416 washing was done for 3 times and then developed with Pierce TMB substrate (ThermoFisher,  
417 USA) for 10 min and then stop with 1N hydrochloric acid (HCl). Finally, plate was read at 450  
418 nm wavelength within 30 min of stopping reaction. Titers were quantified through 5 parameter  
419 logistics best fit curve.

420 For IL-6 analysis, IL-6 Mouse ELISA kit (ThermoFisher, USA) was used. All the steps were  
421 performed as per manufacturer instructions.

422

## 423 **Results**

### 424 **Bioinformatics analysis to initiate the designing of 'BANCOVID'**

425 We have started with alignment of available sequences of SARS-CoV-2 spike (S) protein. In  
426 march, 2020, we found total 15 D614G sequences out of 170 reference sequences of SARS-  
427 CoV-2 (Supplementary Figure: 1A). The full sequence alignment is given elsewhere (data not  
428 shown). Hydropathy profile showed a minor variation in relevant protein between D614 and  
429 G614 genotypes (Supplementary Figure: 1B and C). Relevant 3D modeling suggested that

430 there might be higher angular strain on G614 than the D614, which could affect the stability  
431 and atomic distance with the neighboring atoms (Figure: 1E and F). Our observation has been  
432 recently validated by others.<sup>25, 26,14</sup>

### 433 **Construction, antigen expression and formulation of ‘BANCOVID’**

434 We have obtained the ORF for the SARS-CoV-2 spike with G614-translating codon from a  
435 clinically confirmed COVID-19 patient through PCR amplification (Accession No.:  
436 MT676411.1). Necessary modifications were performed to obtain the desired clone in pET31b  
437 vector as described in ‘Materials and Method’ section. The schematic diagram of the target  
438 gene and construction scheme are shown in Figure: 1A and Supplementary Figure: 2A and B,  
439 respectively. The *in vitro* transcription (IVT) process was modified to obtain high yield and  
440 desired quality of mRNA (Figure: 1B). We have obtained the capped-mRNA with a 130-  
441 nucleotide residue-long poly A tail. The mRNA sequence with poly A tail was confirmed by  
442 DNA sequencing after reverse transcription (Figure: 1C); Accession No.: MWO45214. The  
443 IVT process was tuned to obtain desired mRNA with high yield and quality (Figure: 1C). The  
444 mRNA was encapsulated in lipid nano particle (LNP) ranging from 60 – 140 nm with the final  
445 pH of 7.2. We did a pilot study with limited numbers of mice to identify the suitable mRNA-  
446 LNP size for our formulation. mRNA-LNP either smaller than 70 nm or larger than 110 nm  
447 did not generate considerable immunological response even with a dose of 10 ng/mice (data  
448 not shown). To obtain the best process control for the dose production, we therefore, set our  
449 mRNA-LNP size range at  $85\pm 10$  nm. We used mRNA-LNP of this range throughout the rest  
450 of the experiments (Figure: 1E). LNP without SARS-CoV-2 S-mRNA was used as placebo.

### 451 **Local tolerance and toxicity**

452 Control, treatment and placebo group comprising 3 male mice each were used for local  
453 tolerance testing. Pictures of the site of injection before and 24 hours after injection are shown

454 in Figure 2A (top and bottom panels, respectively). No detrimental physical consequences of  
455 administration were observed such as, local trauma following injection and/or physicochemical  
456 actions of the vaccine from local toxicological or pharmacodynamics effects. No sign of  
457 erythema or erythroderma were observed in muscle tissue section from the site of injection  
458 (Figure: 2B). Complete blood count (CBC) count from different groups indicated good health  
459 status of mice; all parameters were in normal physiological range (Figure: 2C – J). There were  
460 no signs for anemia, infection, inflammation, and bleeding disorder. Liver function tests (LFTs)  
461 such as alanine transaminase (ALT) and aspartate aminotransferase (AST) were performed to  
462 confirm clinical suspicion of potential liver injury or disease and to distinguish between  
463 hepatocellular damage and cholestasis (Figure: 2K and L). Blood urea nitrogen (BUN) was  
464 tested to evaluate the health of kidneys, such as kidney disease or damage (Figure: 2M). Data  
465 for ALT, AST and BUN were in normal range and no significant changes were observed  
466 between pre-immunization and after immunization.

467 **‘BANCOVID’ induces high and Th-1 biased antibodies against full-length SARS-CoV-2**  
468 **S-protein**

469 Immunization of mice with mRNA-LNP produced specific titer at a dose dependent manner  
470 (Figure: 3A). Low dose (0.1 µg/mice) immunization produced moderate level of antibody  
471 response (Figure: 3A, Treatment 1). We found best antibody response with 1 µg/mice dose  
472 (Figure: 3A, Treatment 2). High dose (10 µg/mice) immunization produced higher level of titer  
473 but the response among the mice were inconsistent (Figure: 3A, Treatment 3). The subtyping  
474 analysis revealed that the titer contains balanced ratio of IgG2a and IgG1 in 7-day post  
475 immunization sera, and it remains stable for 14-day post immunization sera (Figure: 3B,  
476 Treatment 2). Similar trend was observed for (IgG2a + IgG2b) and (IgG1+IgG3) (Figure: 3C,  
477 Treatment 2), which has suggested that the antigenic response was CD4+Th1-biased. High  
478 dose (10 µg/mice) injected mice sera also produced similar response (Figure: 3B and C,

479 Treatment 3). The complete isotyping data is shown in Supplementary Figure: 5. To check  
480 whether the immunization have generated antibody pool spanning for the whole antigen or for  
481 any specific domain (S1 or S2), we have chosen surface plasmon resonance (SPR) experiment.  
482 The S protein chip recognized high-affinity antibody from the anti-sera (Figure: 3D). The  
483 response was attenuated significantly for S-protein(s) (S, S1 and S2) pretreated sera (Figure  
484 3D). S and S1 pretreatment showed similar and strong inhibitory response while S2  
485 pretreatment showed comparatively moderate inhibitory response. The purified Ig from the  
486 pooled anti-sera produced significantly pronounced response (Figure: 3E). The SPR data  
487 clearly showed that the vaccination has produced specific antibody pool against the full-length  
488 of S protein.

#### 489 **Cellular and cytokine responses to ‘BANCOVID’**

490 We further characterized the cellular response and induction of specific cytokines in response  
491 to vaccination. The splenocytes obtained from vaccinated mice were re-stimulated with a  
492 library of SARS-CoV-2-S peptide pool. The stimulated splenocytes generated significantly  
493 higher population of CD4+Th1 cytokine IL2- and TNF $\alpha$ -expressing cells ( $0.68 \pm 0.05$  and  $0.9$   
494  $\pm 0.09$ , respectively) compare to the placebo treated group ( $0.22 \pm 0.08$  and  $0.43 \pm 0.06$ ,  
495 respectively) (Figure: 4A and B). CD4+Th2 cytokine IL6-expressing cells were moderately  
496 increased in stimulated splenocytes of vaccinated mice compare to the placebo-injected mice  
497 ( $0.40 \pm 0.07$  and  $0.27 \pm 0.05$ , respectively) (Figure: 4C). The IL2 and IL6 secretion from  
498 restimulated splenocytes were found significantly increased for vaccinated group ( $499.10 \pm$   
499  $30.80$  pg/ml and  $45.78 \pm 15.52$  pg/ml, respectively) over the placebo group ( $175.71 \pm 21.92$   
500  $pg/ml$  and  $16.96 \pm 3.53$  pg/ml, respectively) (Figure: 4D and E). Sustained secretion of  
501 cytokines from splenocytes of vaccinated mice were observed even after 12 hours of  
502 withdrawal of the S-pool protein stimulation; ( $345.17 \pm 22.85$  pg/ml of IL2 and  $136.87 \pm 15.18$   
503  $pg/ml$  of IL6, respectively) (Figure: 4D and E). Higher level of sustained Th1 specific cytokine

504 response over Th2 specific cytokine suggested a stable and balanced Th1-biased immunologic  
505 response after administration of ‘BANCOVID’ vaccine.

## 506 **‘BANCOVID’ induces neutralization of SARS-CoV-2-S pseudo-type viruses**

### 507 *In-vitro neutralization*

508 Sera of vaccinated mice inhibited infection of GFP-expressing pseudo-type SARS-CoV-2-S  
509 adenovirus in hACE2-expressing HEK293 (ACE2-HEK293) cell in a dose dependent manner  
510 (Figure: 5A and B). Neutralization assay demonstrated that there is a correlation between the  
511 intensity of GFP and SARS-CoV-2 specific antibody for vaccinated mice. Higher  
512 concentration of SARS-CoV-2 antibody efficiently neutralize the entry of the pseudovirus into  
513 the ACE2-HEK293 cell. IC<sub>50</sub> value for GFP-inhibition were found significantly higher for the  
514 anti-sera (~3 µg/mL) compared to the CR3022 and a commercially available polyclonal mouse  
515 antibody against S-protein (~7 µg/ml). To confirm whether the GFP signal was generated from  
516 GFP shedding from degraded virus instead of functional virion, we have analyzed the viral  
517 copy number using real-time PCR. The data showed correlation with the GFP and gene copy  
518 analysis (Figure: 5D). HIV1-based SARS-CoV-2-S pseudo type virus infection was also  
519 significantly inhibited by 1 µg/mice dose anti-sera compared to the placebo anti-sera (Figure:  
520 5D, Serum). Either S1 or S2 protein pretreatment nullified the inhibition capacity of anti-sera  
521 (Figure: 5D, Serum+S1 and Serum+S2) confirmed that the inhibition property for the HIV1-  
522 based SARS-CoV-2-S pseudo type virus is related to the vaccination.

### 523 *In-vivo neutralization*

524 Next, we attempted to check whether immunization can protect mice from GFP-expressing  
525 pseudo-type adenovirus. Virus were sprayed through nasopharyngeal space of mice either in  
526 buffer or pretreated with immunized sera. The anti-sera-treated SARS-CoV-2-S adenovirus

527 produced lower copy of virus compared to the buffer-treated virus (Figure: 6A, Treatment 2  
528 and Treatment 1, respectively). The copy number of virus was found reduced further from day  
529 2 to day 3 (Figure: 6A, Treatment 4 and Treatment 3, respectively). These data clearly revealed  
530 that though the anti-serum has significant inhibitory capacity against viral infection but  
531 systemic immune-protection is essential for better protection. Lower copy number of virus over  
532 the time indicated that the cellular immunity is also necessary, along with humoral immunity,  
533 for viral clearance. The anti-sera treated with S1+S2 protein failed to inhibit SARS-CoV-2-S  
534 adenovirus infection in the placebo-injected mice (Figure: 6A, Treatment 5), and proved that  
535 the inhibition and neutralization of the SARS-CoV-2-S pseudo-type virus is correlated with the  
536 immunogenic response generated due to 'BANCOVID'.

537

## 538 **Discussion**

539 The G614 variant was first identified in China and Germany in January, 2020. It was a rare  
540 genotype before March, 2020, which then quickly became the major circulating genotype  
541 worldwide.<sup>14</sup> Cardozo *et. al.*, reported in May, 2020 that G614 genotype is associated with  
542 increased case fatality rate over D614.<sup>27</sup> Scientific findings evidently demonstrated that the  
543 G614 variant is ~10 times more infectious over the D614 genotype.<sup>28,29</sup> It has been revealed  
544 from *in vitro* and clinical data that G614 variant has a distinct phenotype, and there likely be a  
545 huge impact of this mutation on infection, transmission, disease onset, disease prognosis, as  
546 well as on vaccine and therapeutic development.<sup>14,30,31</sup> We found the sequence G614 from a  
547 PCR-confirmed patient in May (Accession No. MT676411.1). Based on the scientific  
548 information available then we have predicted that this variant may become dominant in future,  
549 and at that period of time there was no information for any vaccine candidate in development

550 considering G614 genotype. We, therefore, decided to develop the vaccine considering this  
551 mutation.

552 Since the vaccine may banish (BAN) COVID-19 (COV) and originated from Bangladesh  
553 (BAN) we therefore named it ‘BANCOVID’. The design consideration for the vaccine was to  
554 obtain high-expressing spike protein as antigen in a putative perfusion stabilized condition.  
555 Comparative design features of ‘BANCOVID’ with the available published information for  
556 relevant vaccine candidates in development are shown in Table: 1. ‘BANCOVID’ mRNA has  
557 few features along with the G614-targetted mutations, which are different than the other  
558 relevant known candidates. Ribosome binding site, IgE-signal sequence by replacing the native  
559 13 amino acids from the N-terminal of the SARS-CoV-2 S protein, 3’ UTR constituted with  
560 the 3’UTRs of alpha and beta globin gene in tandem are worth to mention. We have used 70 –  
561 100 nm LNP to deliver the mRNA. LNPs out of this range did not elicit considerable antibody  
562 response in a separate pilot study (data not shown); the best range was observed with 85±10  
563 nm of LNP. The LNP-sizes determine the delivery efficiency of the cargo to the target cells.<sup>32</sup>  
564 The pH (7.2) of our formulation buffer for mRNA-LNP is also lower than the other relevant  
565 references (7.4~8.0).<sup>2,7,8,9</sup> Lower pH helps quick release of the cargo from endosomal  
566 compartment and protects mRNA from acid hydrolysis and lysosomal digestion in intracellular  
567 milieu.<sup>33</sup> Together, numbers of minute changes in the design context likely playing in concert  
568 and produced quick, balanced, stable Th1-IgG2-biased antibody response.

569 ‘BANCOVID’ immunization did not produce any noticeable effect for local or systemic  
570 toxicity as primarily evident by the absence of four cardinal signs of inflammation: redness  
571 (Latin rubor), heat (calor), swelling (tumor), and pain (dolor). There was no erythema or  
572 erythredema as well in any injection site. The CBC and blood chemistry data did not show



573 significant changes in relevant profiles and has been suggesting that the vaccine behaves safely  
574 in animal.

575 **Table 1:** Comparative design features of ‘BANACOVID’.

| <i>Parameter</i>        | <i>BANACOVID</i>                                                                 | <i>Others</i>                                                                                     |
|-------------------------|----------------------------------------------------------------------------------|---------------------------------------------------------------------------------------------------|
| <i>Construct</i>        | T7 promoter                                                                      | T7 promoter <sup>7</sup>                                                                          |
|                         | 51 bp 5'-UTR                                                                     | 5'-UTR <sup>2,7</sup>                                                                             |
|                         | Ribosome binding sequence                                                        | Not specified                                                                                     |
|                         | IgE signal peptide in the ORF                                                    | ORF <sup>2,7,8,9</sup>                                                                            |
|                         | D614G mutation                                                                   | Not in consideration                                                                              |
|                         | K986P and V987P mutations                                                        | K986P and V987P mutations <sup>2,7</sup>                                                          |
|                         | Modified alpha and beta globin in 3'-UTR                                         | 3'-UTR <sup>2,7</sup>                                                                             |
|                         | 130 bp poly A tail                                                               | Poly A tail <sup>2,8</sup><br>poly(A) tail (100 nucleotides) interrupted by a linker <sup>7</sup> |
| <i>LNP</i>              | <b>LNP composition:</b> MC3, DSPC, Cholesterol and DMG-PEG2000 (40:10:38.5:1.5). | <b>LNP composition:</b> ionizable lipid, DSPC, Cholesterol and PEG2000-DMG <sup>8</sup>           |
|                         | <b>Stabilization buffer:</b> 1x PBS, pH 7.2                                      | <b>Stabilization buffer:</b> HEPES buffer, pH 8.0; <sup>8</sup>                                   |
|                         | <b>LNP size range:</b> 85±10 nm                                                  | <b>LNP Size:</b> ~75 nm <sup>9</sup> and average size 100 nm <sup>34</sup>                        |
| <i>IgG2a/IgG1 ratio</i> | ~ 1.0                                                                            | ~ 0.8, <sup>2</sup> 1.6 <sup>9</sup>                                                              |

576 A balanced response between Th1 and Th2 is desired to achieve safe and effective humoral  
577 immunity performance.<sup>35</sup> ‘BANACOVID’ has produced well-balanced IgG1 and IgG2 response  
578 by 7<sup>th</sup> day postimmunization and remained similar on 14<sup>th</sup> day postimmunization sera, which  
579 is suggesting a stable antibody response during the sampling period. Along with opsonizing  
580 characteristics, IgG2 has higher affinity to its receptors and have superior complement system  
581 activation potential over IgG1.<sup>35,36</sup> Accordingly, ‘BANACOVID’-mediated higher ratio of IgG2  
582 than IgG1 has suggested that higher capacity of the antibody pool to clear antigen from the  
583 system. The ratio of IgG2a and IgG1, and cytokine-stained CD4<sup>+</sup> and CD8<sup>+</sup> T cell population  
584 showed a Th1-bias response. Since mouse IgG2 is equivalent to human IgG1<sup>35,36</sup> therefore, it

585 is plausible that ‘BANCOVID’ will elicit effective cellular and humoral response against  
586 SARS-CoV-2 in human.

587 The early vaccine development initiatives were taken before the G614 variant became  
588 predominant. Therefore, there are no specific vaccine tested so far in human with G614 variant-  
589 related molecule. Studies with the sera obtained from COVID-19 patients showed variable  
590 results regarding the neutralization propensity of D614 and G614 genotype. With 88 sera from  
591 a high-incidence community, Sadtler *et al.*, showed that antibody pool did not differentiate  
592 between D614 and G614 binding.<sup>15,37</sup> However, a few data point stayed out of the correlation  
593 trend in their study, which might be linked with the functional variations associated with the  
594 SARS-CoV-2 variants. Korber *et al.*, with 6 convalescent sera, showed that D614 and G614  
595 both types of VSV-pseudovirus can be inhibited by the sera; though G614 and D614 showed  
596 little variation in their responses to the assay<sup>14</sup>. They further showed that the G614 genotype  
597 produced higher titers against pseudoviruses from *in vitro* experiments. The variations  
598 observed in both of the studies might not be just a coincident rather suggesting potential  
599 differences in *modus operandi* between the G614 and D614 variants. The proposition is  
600 supported by the Huang *et al.*; they have showed that 7% of the convalescent sera out of their  
601 70 samples failed to neutralize G614 variant of pseudovirus.<sup>38</sup> All of these studies did not  
602 identify whether the subjects were infected by either D614 or G614 variant, which could have  
603 revealed better insight for the correlation of the observation.

604 The roles of G614 mutation on constitutive infection have been attributed to its conformational  
605 change. It has been proposed that the -COOH group of D614 forms hydrogen bond with the -  
606 OH group of T859 across the S1/S2 interface, which cannot form in G614.<sup>14</sup> On the contrary,  
607 structural modeling studies revealed that “the D614G substitution creates a sticky packing  
608 defect in subunit S1, promoting its association with subunit S2 as a means to stabilize the

609 structure of S1 within the S1/S2 complex.<sup>30</sup> In other words, the D614G mutation in fact  
610 promotes the S1/S2 association and stabilize the spike.<sup>30</sup> The finding is in accordance with the  
611 observation that G614 has a greater stability originating from less S1 domain shedding and  
612 greater accumulation of the intact S protein into the pseudovirion.<sup>29</sup> It has also been reported  
613 that G614 mutation promoted the interaction of two of the three S glycoprotein chains with the  
614 RBD whereas only one chain from D614 interacts with RBD.<sup>26</sup> This interaction creates  
615 favorable conformation of the RBD to its partners resulting higher access for effective binding  
616 and infection.

617 Predecessor SARS-CoV virus entry and infection was shown promoted by protease-mediated  
618 processing of the spike protein.<sup>39</sup> It has been postulated that SARS-CoV-2 also likely be  
619 adopting such properties by acquiring G614 genotype by incorporating protease processing  
620 site.<sup>40</sup> Consequently, it has been shown that indeed G614 protein has been cleaved by serine  
621 protease elastase-2 more efficiently than the D614 variant.<sup>38</sup> They further showed that G614  
622 pseudovirus infection of 293T-ACE2 was potentiated in the presence of elastase-2, which can  
623 be blocked by elastase inhibitor. These findings corroborate the fact that G614-targetted  
624 vaccine is necessary.

625 Two prominent antigenic sites on the S-protein have been proposed those are spanning 614  
626 position: V515-D614 and D614-A647.<sup>41,30</sup> The role of V515-D614 domain is not known but  
627 the D614-A647 is a dehydron wrapped intramolecularly by residues D614, V615, T645, R646  
628 and A647, and forms a salt bridge with D614. The salt bridge contributes to stabilize D614-  
629 A647 in the uncomplexed S1 and inhibits the S1/S2 association. G614 diminishes the salt  
630 bridge formation and S1/S2 association resulting interaction with the RBD to facilitate higher  
631 infection.<sup>30</sup> Therefore, blocking of G614 with a specific antibody would inhibit such acquired  
632 fitness of SARS-CoV-2. 'BANCOVID' immunization has produced a pool of antibody that

633 covers the whole length of the spike protein suggesting that highly likely relevant antibody-  
634 mix against these domains have been developed. Since relevant domains are highly  
635 glycosylated therefore, we could not obtain homotypic peptides for definitive characterization  
636 of the purified antibody pool against these predicted antigens. Further study will be attempted  
637 to reveal the relevant scientific aspects. Nevertheless, the findings clearly demonstrated that  
638 ‘BANCOVID’ is safe for *in vivo* administration, and elicits balanced and stable cellular and  
639 humoral response that neutralize SARS-CoV-2 spike protein-mediated infection. Currently, we  
640 have been preparing for the phase-1 clinical trial. Appropriate clinical trial will reveal further  
641 insight regarding the significance of G614-targetted vaccine for the efficient management of  
642 COVID-19 pandemic.

643 The recent metadata analysis on more than 5000 clinical samples revealed that 100% of the  
644 second-wave of infection has been associated with G614 variant, which is emphasizing the  
645 need for G614-targetted vaccine for managing this uncontrolled infection.<sup>13</sup> Therefore, the  
646 rapid transition of the 1<sup>st</sup> G614-targetted vaccine ‘BANCOVID’ to clinical trial would be  
647 highly rewarding.

648

#### 649 **Acknowledgements**

650 The study was funded by Globe Biotech Ltd. We thank Md. Harunur Rashid, the chairman of  
651 Globe Pharmaceuticals Group of Companies, Ahmed Hossain, Md. Mamunur Rashid and Md.  
652 Shahiduddin Alamgir, the directors of Globe Pharmaceuticals Group of Companies for their  
653 continuous support and encouragement. We also thank Md. Raihanul Hoque, Dibakor Paul,  
654 Biplob Biswas, Zahir Uddin Babor, Mithun Kumar Nag and Imran Hossain for their support  
655 for facility and information management system.

## 656 References

- 657 (1) Tai, W.; Zhang, X.; Drelich, A.; Shi, J.; Hsu, J. C.; Luchsinger, L.; Hillyer, C. D.;  
658 Tseng, C.-T. K.; Jiang, S.; Du, L. A Novel Receptor-Binding Domain (RBD)-Based  
659 mRNA Vaccine against SARS-CoV-2. *Cell Res.* **2020**. [https://doi.org/10.1038/s41422-](https://doi.org/10.1038/s41422-020-0387-5)  
660 020-0387-5.
- 661 (2) Corbett, K. S.; Edwards, D. K.; Leist, S. R.; Abiona, O. M.; Boyoglu-Barnum, S.;  
662 Gillespie, R. A.; Himansu, S.; Schäfer, A.; Ziawo, C. T.; DiPiazza, A. T.; Dinno, K.  
663 H.; Elbashir, S. M.; Shaw, C. A.; Woods, A.; Fritch, E. J.; Martinez, D. R.; Bock, K. W.;  
664 Minai, M.; Nagata, B. M.; Hutchinson, G. B.; Wu, K.; Henry, C.; Bahi, K.; Garcia-  
665 Dominguez, D.; Ma, L.; Renzi, I.; Kong, W.-P.; Schmidt, S. D.; Wang, L.; Zhang, Y.;  
666 Phung, E.; Chang, L. A.; Loomis, R. J.; Altaras, N. E.; Narayanan, E.; Metkar, M.;  
667 Presnyak, V.; Liu, C.; Louder, M. K.; Shi, W.; Leung, K.; Yang, E. S.; West, A.; Gully,  
668 K. L.; Stevens, L. J.; Wang, N.; Wrapp, D.; Doria-Rose, N. A.; Stewart-Jones, G.;  
669 Bennett, H.; Alvarado, G. S.; Nason, M. C.; Ruckwardt, T. J.; McLellan, J. S.; Denison,  
670 M. R.; Chappell, J. D.; Moore, I. N.; Morabito, K. M.; Mascola, J. R.; Baric, R. S.; Carfi,  
671 A.; Graham, B. S. SARS-CoV-2 mRNA Vaccine Design Enabled by Prototype  
672 Pathogen Preparedness. *Nature* **2020**. <https://doi.org/10.1038/s41586-020-2622-0>.
- 673 (3) Feng, W.; Zong, W.; Wang, F.; Ju, S. Severe Acute Respiratory Syndrome  
674 Coronavirus 2 (SARS-CoV-2): A Review. *Mol. Cancer* **2020**, *19* (1), 100.  
675 <https://doi.org/10.1186/s12943-020-01218-1>.
- 676 (4) *COVID-19 Public Health Emergency of International Concern (PHEIC) Global*  
677 *Research and Innovation Forum*; 2020; pp 1–7.
- 678 (5) Rauch, S.; Jasny, E.; Schmidt, K. E.; Petsch, B. New Vaccine Technologies to Combat  
679 Outbreak Situations. *Front. Immunol.* **2018**, *9*, 1963.  
680 <https://doi.org/10.3389/fimmu.2018.01963>.
- 681 (6) Pardi, N.; Hogan, M. J.; Porter, F. W.; Weissman, D. mRNA Vaccines — a New Era  
682 in Vaccinology. *Nat. Rev. Drug Discov.* **2018**, *17* (4), 261–279.  
683 <https://doi.org/10.1038/nrd.2017.243>.
- 684 (7) Vogel, A. B.; Kanevsky, I.; Che, Y.; Swanson, K. A.; Muik, A.; Vormehr, M.; Kranz,  
685 L. M.; Walzer, K. C.; Hein, S.; Güler, A.; Loschko, J.; Maddur, M. S.; Tompkins, K.;  
686 Cole, J.; Lui, B. G.; Ziegenhals, T.; Plaschke, A.; Eisel, D.; Dany, S. C.; Fesser, S.;  
687 Erbar, S.; Bates, F.; Schneider, D.; Jesionek, B.; Sängler, B.; Wallisch, A.-K.; Feuchter,  
688 Y.; Junginger, H.; Krumm, S. A.; Heinen, A. P.; Adams-Quack, P.; Schlereth, J.;  
689 Kröner, C.; Hall-Ursone, S.; Brasky, K.; Griffor, M. C.; Han, S.; Lees, J. A.;  
690 Mashalidis, E. H.; Sahasrabudhe, P. V.; Tan, C. Y.; Pavliakova, D.; Singh, G.; Fontes-  
691 Garfias, C.; Pride, M.; Scully, I. L.; Ciolino, T.; Obregon, J.; Gazi, M.; Carrion, R.;  
692 Alfson, K. J.; Kalina, W. V.; Kaushal, D.; Shi, P.-Y.; Klamp, T.; Rosenbaum, C.;  
693 Kuhn, A. N.; Türeci, Ö.; Dormitzer, P. R.; Jansen, K. U.; Sahin, U. *A Prefusion SARS-*  
694 *CoV-2 Spike RNA Vaccine Is Highly Immunogenic and Prevents Lung Infection in*  
695 *Non-Human Primates*; preprint; Immunology, 2020.  
696 <https://doi.org/10.1101/2020.09.08.280818>.

- 697 (8) de Alwis, R.; Gan, E. S.; Chen, S.; Leong, Y. S.; Tan, H. C.; Zhang, S. L.; Yau, C.;  
698 Matsuda, D.; Allen, E.; Hartman, P.; Park, J.; Alayyoubi, M.; Bhaskaran, H.;  
699 Dukanovic, A.; Bao, B.; Clemente, B.; Vega, J.; Roberts, S.; Gonzalez, J. A.; Sablad,  
700 M.; Yelin, R.; Taylor, W.; Tachikawa, K.; Parker, S.; Karmali, P.; Davis, J.; Sullivan,  
701 S. M.; Hughes, S. G.; Chivukula, P.; Ooi, E. E. *A Single Dose of Self-Transcribing and*  
702 *Replicating RNA Based SARS-CoV-2 Vaccine Produces Protective Adaptive Immunity*  
703 *In Mice*; preprint; Immunology, 2020. <https://doi.org/10.1101/2020.09.03.280446>.
- 704 (9) McKay, P. F.; Hu, K.; Blakney, A. K.; Samnuan, K.; Brown, J. C.; Penn, R.; Zhou, J.;  
705 Bouton, C. R.; Rogers, P.; Polra, K.; Lin, P. J. C.; Barbosa, C.; Tam, Y. K.; Barclay,  
706 W. S.; Shattock, R. J. Self-Amplifying RNA SARS-CoV-2 Lipid Nanoparticle Vaccine  
707 Candidate Induces High Neutralizing Antibody Titers in Mice. *Nat. Commun.* **2020**, *11*  
708 (1), 3523. <https://doi.org/10.1038/s41467-020-17409-9>.
- 709 (10) Garber, K. Alnylam Launches Era of RNAi Drugs. *Nat. Biotechnol.* **2018**, *36* (9), 777–  
710 778. <https://doi.org/10.1038/nbt0918-777>.
- 711 (11) Sevajol, M.; Subissi, L.; Decroly, E.; Canard, B.; Imbert, I. Insights into RNA  
712 Synthesis, Capping, and Proofreading Mechanisms of SARS-Coronavirus. *Virus Res.*  
713 **2014**, *194*, 90–99. <https://doi.org/10.1016/j.virusres.2014.10.008>.
- 714 (12) Smith, E. C.; Blanc, H.; Vignuzzi, M.; Denison, M. R. Coronaviruses Lacking  
715 Exoribonuclease Activity Are Susceptible to Lethal Mutagenesis: Evidence for  
716 Proofreading and Potential Therapeutics. *PLoS Pathog.* **2013**, *9* (8), e1003565.  
717 <https://doi.org/10.1371/journal.ppat.1003565>.
- 718 (13) Long, S. W.; Olsen, R. J.; Christensen, P. A.; Bernard, D. W.; Davis, J. J.; Shukla, M.;  
719 Nguyen, M.; Saavedra, M. O.; Yerramilli, P.; Pruitt, L.; Subedi, S.; Kuo, H.-C.;  
720 Hendrickson, H.; Eskandari, G.; Nguyen, H. A. T.; Long, J. H.; Kumaraswami, M.;  
721 Goike, J.; Boutz, D.; Gollihar, J.; McLellan, J. S.; Chou, C.-W.; Javanmardi, K.;  
722 Finkelstein, I. J.; Musser, J. *Molecular Architecture of Early Dissemination and*  
723 *Massive Second Wave of the SARS-CoV-2 Virus in a Major Metropolitan Area*;  
724 preprint; Pathology, 2020. <https://doi.org/10.1101/2020.09.22.20199125>.
- 725 (14) Korber, B.; Fischer, W. M.; Gnanakaran, S.; Yoon, H.; Theiler, J.; Abfalterer, W.;  
726 Hengartner, N.; Giorgi, E. E.; Bhattacharya, T.; Foley, B.; Hastie, K. M.; Parker, M.  
727 D.; Partridge, D. G.; Evans, C. M.; Freeman, T. M.; de Silva, T. I.; McDanal, C.;  
728 Perez, L. G.; Tang, H.; Moon-Walker, A.; Whelan, S. P.; LaBranche, C. C.; Saphire, E.  
729 O.; Montefiori, D. C.; Angyal, A.; Brown, R. L.; Carrilero, L.; Green, L. R.; Groves,  
730 D. C.; Johnson, K. J.; Keeley, A. J.; Lindsey, B. B.; Parsons, P. J.; Raza, M.; Rowland-  
731 Jones, S.; Smith, N.; Tucker, R. M.; Wang, D.; Wyles, M. D. Tracking Changes in  
732 SARS-CoV-2 Spike: Evidence That D614G Increases Infectivity of the COVID-19  
733 Virus. *Cell* **2020**, *182* (4), 812–827.e19. <https://doi.org/10.1016/j.cell.2020.06.043>.
- 734 (15) Klumpp-Thomas, C.; Kalish, H.; Hicks, J.; Mehalko, J.; Drew, M.; Memoli, M. J.;  
735 Hall, M. D.; Esposito, D.; Sadtler, K. D614G Spike Variant Does Not Alter IgG, IgM,  
736 or IgA Spike Seroassay Performance. *MedRxiv Prepr. Serv. Health Sci.* **2020**.  
737 <https://doi.org/10.1101/2020.07.08.20147371>.
- 738 (16) Pettersen, E. F.; Goddard, T. D.; Huang, C. C.; Couch, G. S.; Greenblatt, D. M.; Meng,  
739 E. C.; Ferrin, T. E. UCSF Chimera?A Visualization System for Exploratory Research

- 740 and Analysis. *J. Comput. Chem.* **2004**, 25 (13), 1605–1612.  
741 <https://doi.org/10.1002/jcc.20084>.
- 742 (17) Kelley, L. A.; Mezulis, S.; Yates, C. M.; Wass, M. N.; Sternberg, M. J. E. The Phyre2  
743 Web Portal for Protein Modeling, Prediction and Analysis. *Nat. Protoc.* **2015**, 10 (6),  
744 845–858. <https://doi.org/10.1038/nprot.2015.053>.
- 745 (18) Haryadi, R.; Ho, S.; Kok, Y. J.; Pu, H. X.; Zheng, L.; Pereira, N. A.; Li, B.; Bi, X.;  
746 Goh, L.-T.; Yang, Y.; Song, Z. Optimization of Heavy Chain and Light Chain Signal  
747 Peptides for High Level Expression of Therapeutic Antibodies in CHO Cells. *PLoS*  
748 *One* **2015**, 10 (2), e0116878. <https://doi.org/10.1371/journal.pone.0116878>.
- 749 (19) Evers, M. J. W.; Kulkarni, J. A.; van der Meel, R.; Cullis, P. R.; Vader, P.; Schiffflers,  
750 R. M. State-of-the-Art Design and Rapid-Mixing Production Techniques of Lipid  
751 Nanoparticles for Nucleic Acid Delivery. *Small Methods* **2018**, 2 (9), 1700375.  
752 <https://doi.org/10.1002/smt.201700375>.
- 753 (20) Corbett, K. S.; Edwards, D.; Leist, S. R.; Abiona, O. M.; Boyoglu-Barnum, S.;  
754 Gillespie, R. A.; Himansu, S.; Schäfer, A.; Ziwawo, C. T.; DiPiazza, A. T.; Dinnon, K.  
755 H.; Elbashir, S. M.; Shaw, C. A.; Woods, A.; Fritch, E. J.; Martinez, D. R.; Bock, K.  
756 W.; Minai, M.; Nagata, B. M.; Hutchinson, G. B.; Bahl, K.; Garcia-Dominguez, D.;  
757 Ma, L.; Renzi, I.; Kong, W.-P.; Schmidt, S. D.; Wang, L.; Zhang, Y.; Stevens, L. J.;  
758 Phung, E.; Chang, L. A.; Loomis, R. J.; Altaras, N. E.; Narayanan, E.; Metkar, M.;  
759 Presnyak, V.; Liu, C.; Louder, M. K.; Shi, W.; Leung, K.; Yang, E. S.; West, A.;  
760 Gully, K. L.; Wang, N.; Wrapp, D.; Doria-Rose, N. A.; Stewart-Jones, G.; Bennett, H.;  
761 Nason, M. C.; Ruckwardt, T. J.; McLellan, J. S.; Denison, M. R.; Chappell, J. D.;  
762 Moore, I. N.; Morabito, K. M.; Mascola, J. R.; Baric, R. S.; Carfi, A.; Graham, B. S.  
763 *SARS-CoV-2 MRNA Vaccine Development Enabled by Prototype Pathogen*  
764 *Preparedness*; preprint; Immunology, 2020.  
765 <https://doi.org/10.1101/2020.06.11.145920>.
- 766 (21) Ball, R. L.; Knapp, C. M.; Whitehead, K. A. Lipidoid Nanoparticles for siRNA  
767 Delivery to the Intestinal Epithelium: In Vitro Investigations in a Caco-2 Model. *PLOS*  
768 *ONE* **2015**, 10 (7), e0133154. <https://doi.org/10.1371/journal.pone.0133154>.
- 769 (22) A., A.; A., M.; F., P. Lipid Nanoparticulate Drug Delivery Systems: A Revolution in  
770 Dosage Form Design and Development. In *Recent Advances in Novel Drug Carrier*  
771 *Systems*; Sezer, A. D., Ed.; InTech, 2012. <https://doi.org/10.5772/50486>.
- 772 (23) Ball, R.; Bajaj, P.; Whitehead, K. Achieving Long-Term Stability of Lipid  
773 Nanoparticles: Examining the Effect of PH, Temperature, and Lyophilization. *Int. J.*  
774 *Nanomedicine* **2016**, Volume 12, 305–315. <https://doi.org/10.2147/IJN.S123062>.
- 775 (24) Tashiro, A.; Zhao, C.; Suh, H.; Gage, F. H. Purification and Injection of Retroviral  
776 Vectors. *Cold Spring Harb. Protoc.* **2015**, 2015 (10), pdb.prot086371.  
777 <https://doi.org/10.1101/pdb.prot086371>.
- 778 (25) Hilleman, M. R. Recombinant Vector Vaccines in Vaccinology. *Dev. Biol. Stand.*  
779 **1994**, 82, 3–20.
- 780 (26) Omotuyi, I. O.; Nash, O.; Ajiboye, O. B.; Iwegbulam, C. G.; Oyinloye, E. B.; Oyedeji,  
781 O. A.; Kashim, Z. A.; Okaiyeto, K. Atomistic Simulation Reveals Structural  
782 Mechanisms Underlying D614G Spike Glycoprotein-Enhanced Fitness in SARS-

- 783 COV-2. *J. Comput. Chem.* **2020**, *41* (24), 2158–2161.  
784 <https://doi.org/10.1002/jcc.26383>.
- 785 (27) Becerra-Flores, M.; Cardozo, T. SARS-CoV-2 Viral Spike G614 Mutation Exhibits  
786 Higher Case Fatality Rate. *Int. J. Clin. Pract.* **2020**, e13525.  
787 <https://doi.org/10.1111/ijcp.13525>.
- 788 (28) Daniloski, Z.; Jordan, T. X.; Ilmain, J. K.; Guo, X.; Bhabha, G.; tenOever, B. R.;  
789 Sanjana, N. E. *The Spike D614G Mutation Increases SARS-CoV-2 Infection of Multiple*  
790 *Human Cell Types*; preprint; Genetics, 2020.  
791 <https://doi.org/10.1101/2020.06.14.151357>.
- 792 (29) Zhang, L.; Jackson, C. B.; Mou, H.; Ojha, A.; Rangarajan, E. S.; Izard, T.; Farzan, M.;  
793 Choe, H. *The D614G Mutation in the SARS-CoV-2 Spike Protein Reduces SI Shedding*  
794 *and Increases Infectivity*; preprint; Microbiology, 2020.  
795 <https://doi.org/10.1101/2020.06.12.148726>.
- 796 (30) Fernández, A. Structural Impact of Mutation D614G in SARS-CoV-2 Spike Protein:  
797 Enhanced Infectivity and Therapeutic Opportunity. *ACS Med. Chem. Lett.* **2020**, *11*  
798 (9), 1667–1670. <https://doi.org/10.1021/acsmchemlett.0c00410>.
- 799 (31) Shi, P.-Y.; Plante, J.; Liu, Y.; Liu, J.; Xia, H.; Johnson, B.; Lokugamage, K.; Zhang,  
800 X.; Muruato, A.; Zou, J.; Fontes-Garfias, C.; Mirchandani, D.; Scharton, D.; Kalveram,  
801 B.; Bilello, J.; Ku, Z.; An, Z.; Freiberg, A.; Menachery, V.; Xie, X.; Plante, K.;  
802 Weaver, S. Spike Mutation D614G Alters SARS-CoV-2 Fitness and Neutralization  
803 Susceptibility. *Res. Sq.* **2020**. <https://doi.org/10.21203/rs.3.rs-70482/v1>.
- 804 (32) Nakamura, T.; Kawai, M.; Sato, Y.; Maeki, M.; Tokeshi, M.; Harashima, H. The Effect  
805 of Size and Charge of Lipid Nanoparticles Prepared by Microfluidic Mixing on Their  
806 Lymph Node Transitivity and Distribution. *Mol. Pharm.* **2020**, *17* (3), 944–953.  
807 <https://doi.org/10.1021/acs.molpharmaceut.9b01182>.
- 808 (33) Lin, Q.; Chen, J.; Zhang, Z.; Zheng, G. Lipid-Based Nanoparticles in the Systemic  
809 Delivery of siRNA. *Nanomed.* **2014**, *9* (1), 105–120.  
810 <https://doi.org/10.2217/nnm.13.192>.
- 811 (34) Lu, J.; Lu, G.; Tan, S.; Xia, J.; Xiong, H.; Yu, X.; Qi, Q.; Yu, X.; Li, L.; Yu, H.; Xia,  
812 N.; Zhang, T.; Xu, Y.; Lin, J. A COVID-19 mRNA Vaccine Encoding SARS-CoV-2  
813 Virus-like Particles Induces a Strong Antiviral-like Immune Response in Mice. *Cell*  
814 *Res.* **2020**. <https://doi.org/10.1038/s41422-020-00392-7>.
- 815 (35) Spellberg, B.; Edwards, J. E. Type 1/Type 2 Immunity in Infectious Diseases. *Clin.*  
816 *Infect. Dis. Off. Publ. Infect. Dis. Soc. Am.* **2001**, *32* (1), 76–102.  
817 <https://doi.org/10.1086/317537>.
- 818 (36) Collins, A. M. IgG Subclass Co-Expression Brings Harmony to the Quartet Model of  
819 Murine IgG Function. *Immunol. Cell Biol.* **2016**, *94* (10), 949–954.  
820 <https://doi.org/10.1038/icb.2016.65>.
- 821 (37) Hicks, J.; Klumpp-Thomas, C.; Kalish, H.; Shunmugavel, A.; Mehalko, J.; Denson, J.-  
822 P.; Snead, K.; Drew, M.; Corbett, K.; Graham, B.; Hall, M. D.; Esposito, D.; Sadtler,  
823 K. *Serologic Cross-Reactivity of SARS-CoV-2 with Endemic and Seasonal*  
824 *Betacoronaviruses*; preprint; Infectious Diseases (except HIV/AIDS), 2020.  
825 <https://doi.org/10.1101/2020.06.22.20137695>.



- 826 (38) Hu, J.; He, C.-L.; Gao, Q.-Z.; Zhang, G.-J.; Cao, X.-X.; Long, Q.-X.; Deng, H.-J.;  
827 Huang, L.-Y.; Chen, J.; Wang, K.; Tang, N.; Huang, A.-L. *D614G Mutation of SARS-*  
828 *CoV-2 Spike Protein Enhances Viral Infectivity*; preprint; Microbiology, 2020.  
829 <https://doi.org/10.1101/2020.06.20.161323>.
- 830 (39) Belouzard, S.; Chu, V. C.; Whittaker, G. R. Activation of the SARS Coronavirus Spike  
831 Protein via Sequential Proteolytic Cleavage at Two Distinct Sites. *Proc. Natl. Acad.*  
832 *Sci. U. S. A.* **2009**, *106* (14), 5871–5876. <https://doi.org/10.1073/pnas.0809524106>.
- 833 (40) Bhattacharyya, C.; Das, C.; Ghosh, A.; Singh, A. K.; Mukherjee, S.; Majumder, P. P.;  
834 Basu, A.; Biswas, N. K. *Global Spread of SARS-CoV-2 Subtype with Spike Protein*  
835 *Mutation D614G Is Shaped by Human Genomic Variations That Regulate Expression*  
836 *of TMPRSS2 and MX1 Genes*; preprint; Genomics, 2020.  
837 <https://doi.org/10.1101/2020.05.04.075911>.
- 838 (41) Banerjee, A.; Santra, D.; Maiti, S. Energetics and IC50 Based Epitope Screening in  
839 SARS CoV-2 (COVID 19) Spike Protein by Immunoinformatic Analysis Implicating  
840 for a Suitable Vaccine Development. *J. Transl. Med.* **2020**, *18* (1), 281.  
841 <https://doi.org/10.1186/s12967-020-02435-4>.

842

843

844

845

846

847

848

849

850

851

852

853

854

855

856

857

858

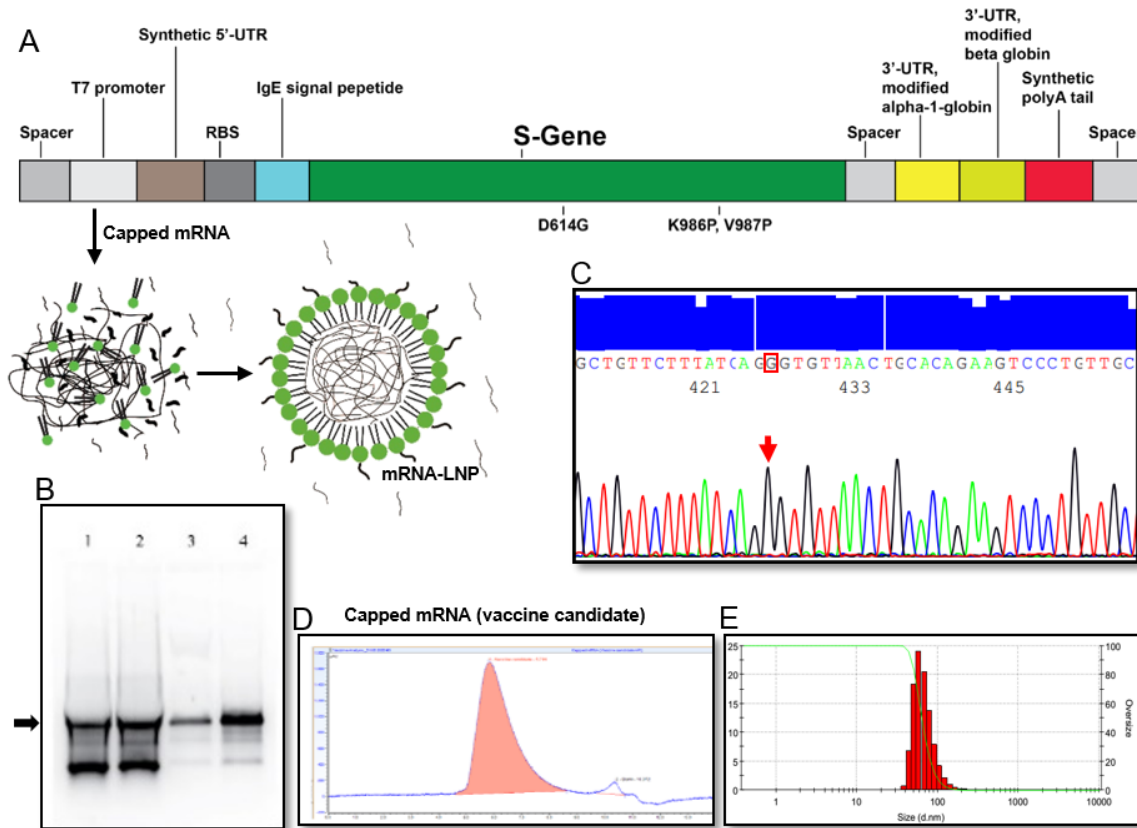

859

860 **Figure 1:** Target construction, amplification, IVT optimization, purification, and LNP  
861 formation. (A) Graphical representation of linear DNA construct for mRNA transcription, (B)  
862 DNA sequencing electropherogram data of D614G sequence in the target, (C) IVT  
863 optimization where Lane 4 is the optimized condition, (D) Identification of purified capped  
864 mRNA by SEC-HPLC, (E) size distribution of mRNA-LNP dose formulation.

865

866

867

868

869

870

871

872

873

874

875

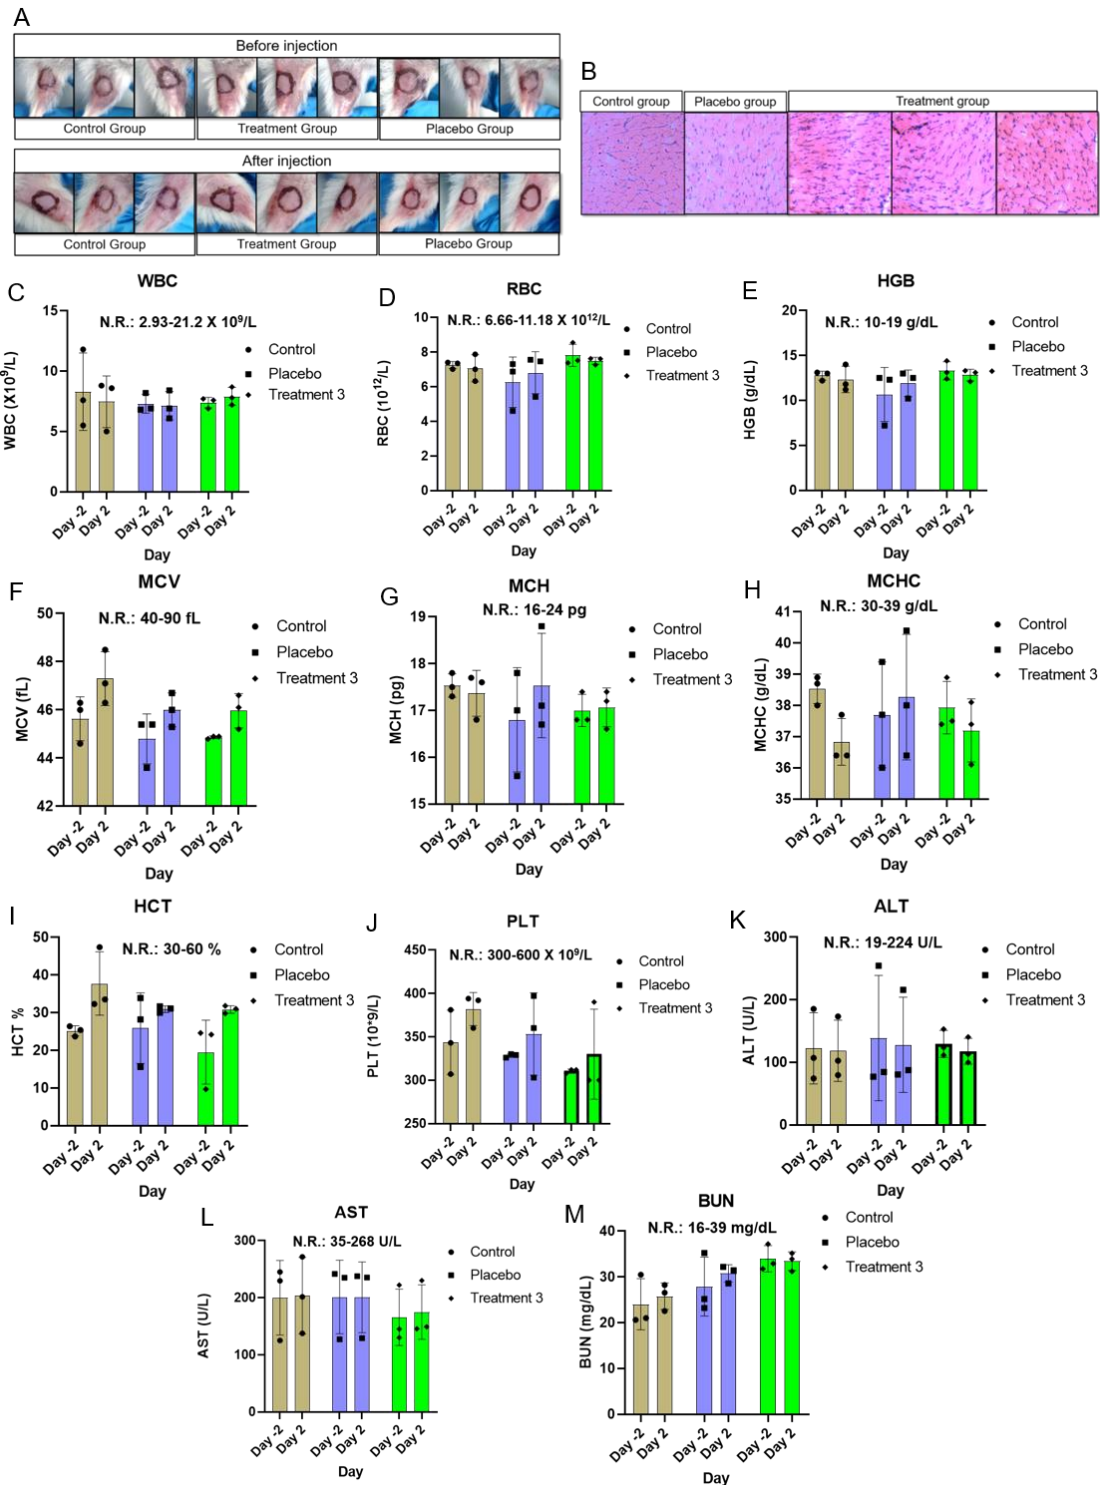

876

877 **Figure 2:** Local tolerance and CBC analysis. (A) check for sign of visible adverse reaction of  
 878 administration before and after injection, (B) HE stained tissue from site of injection for  
 879 erythema and edema, (C) WBC, white blood count, (D) RBC, red blood cell, (E) HGB,  
 880 hemoglobin, (F) MCV, mean corpuscular volume, (G) MCH, mean corpuscular hemoglobin,  
 881 (H) MCHC, mean corpuscular hemoglobin concentration, (I) HCT, hematocrit, (J) PLT,  
 882 platelet, (K) ALT/GPT, alanine transaminase, (L) AST/GOT, aspartate aminotransferase, (M)  
 883 BUN, blood urea nitrogen.

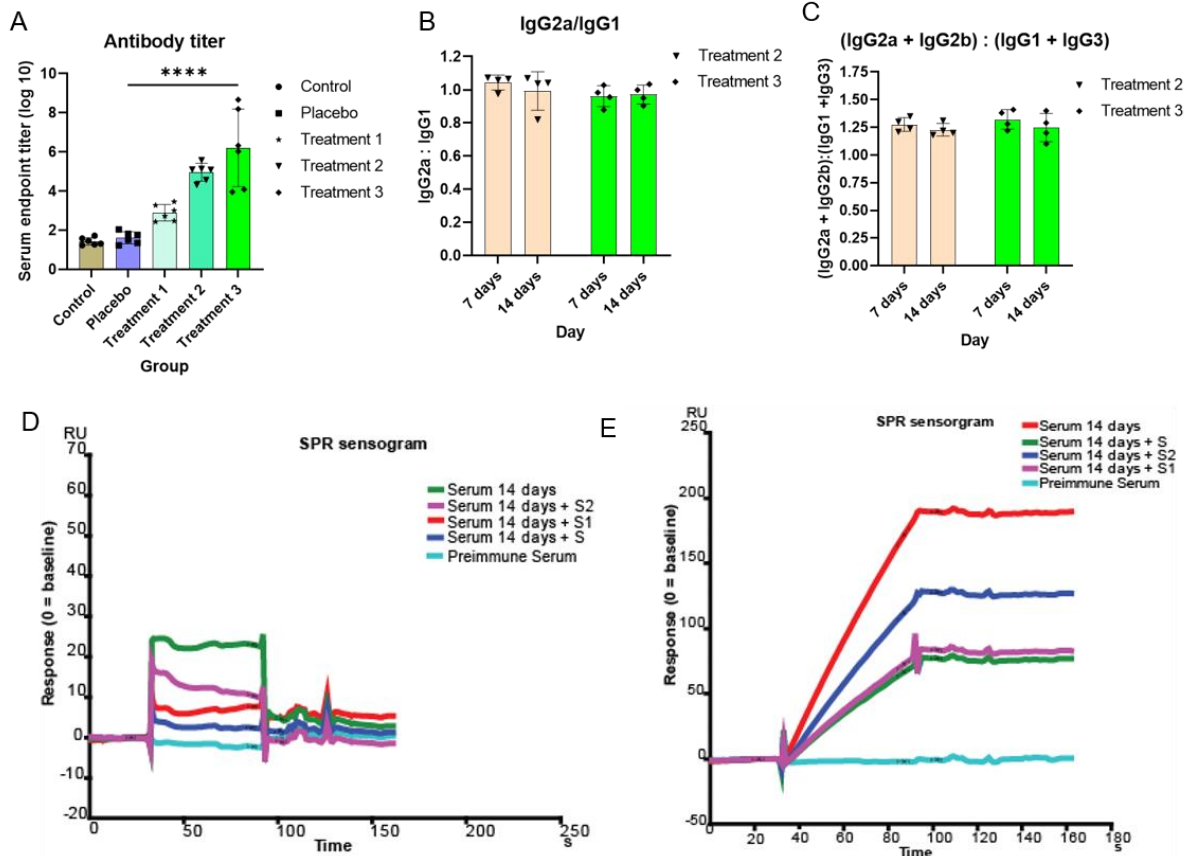

884

885 **Figure 3:** Antibody affinity and titer analysis. (A) antibody titer analysis from serum of  
886 different groups after 14 days of immunization, all the group data were compared (1.0  $\mu$ g and  
887 10.0  $\mu$ g) by Mann-Whitney test, \*\*\*\*= $p$ -value $<$  0.0001, (B) ratio of IgG2a and IgG1 in  
888 treatment 2 and treatment 3 group, (C) ratio of IgG2a+IgG2b and IgG1+IgG3 in treatment 2  
889 and treatment 3 group. (D) serum antibody affinity analysis, (E) resin pull-down serum  
890 antibody affinity analysis.

891

892

893

894

895

896

897

898

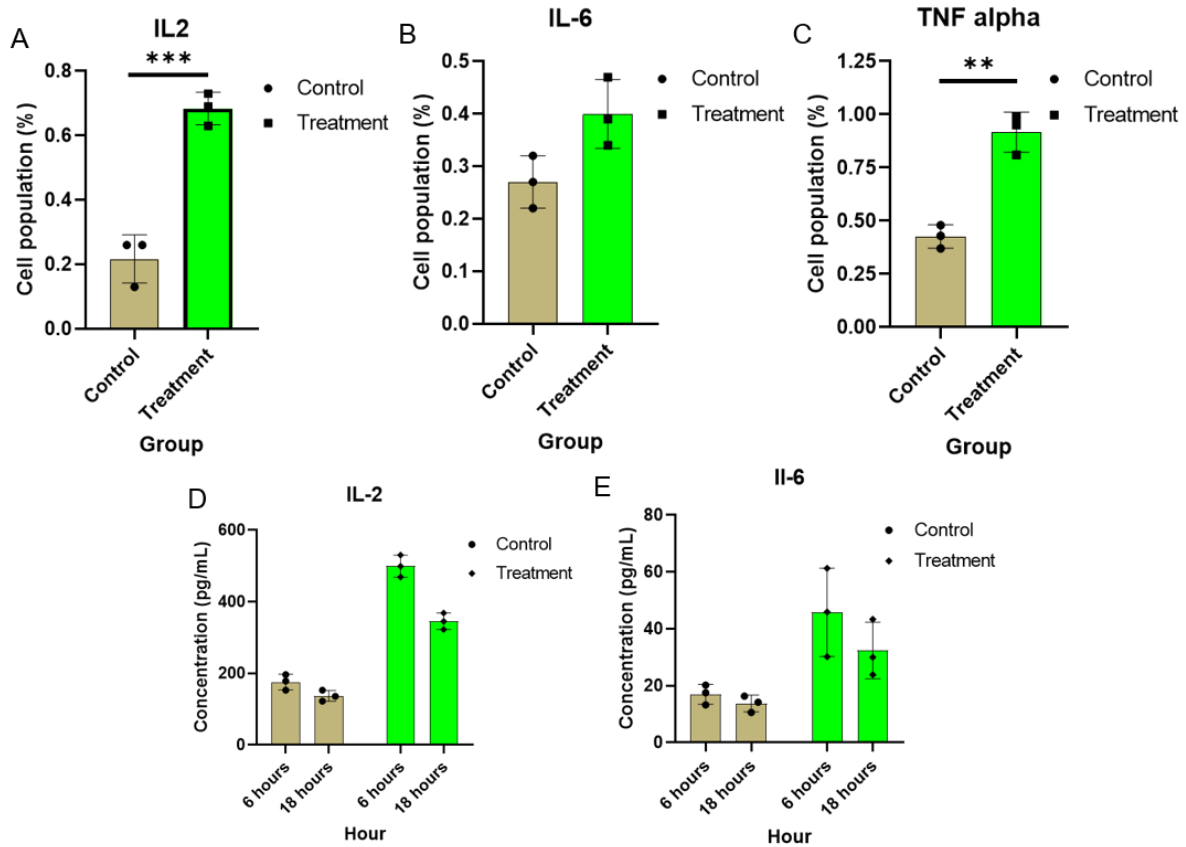

899

900 **Figure 4:** Cellular immune response analysis (internal and secretory cytokine) in control and  
901 treatment group; unpaired T-test were performed between control and treatment groups; \*\*\*=  
902 p-value<0.001, \*\*= p-value<0.01, (A) IL-2 expressing cell population percentage of control  
903 and treatment group, (B) IL-6 expressing cell population percentage of control and treatment  
904 group, statistically non-significant, (C) TNF- $\alpha$  expressing cell population percentage of control  
905 and treatment group, (D) secretory IL-2 concentration analysis between control and treatment  
906 groups at 6 and 18 hours, (E) secretory IL-6 concentration analysis between control and  
907 treatment groups at 6 and 18 hours.

908

909

910

911

912

913

914

915

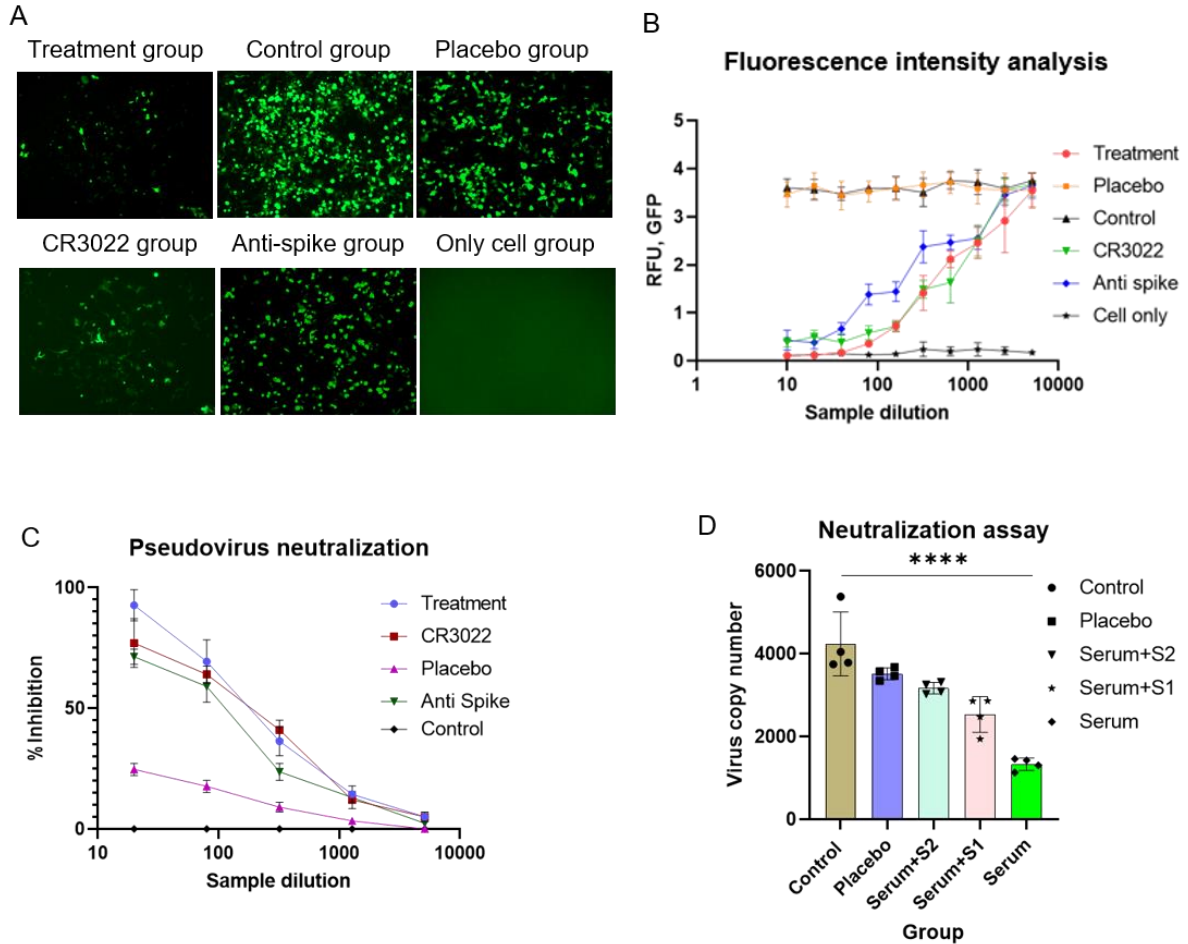

916

917 **Figure 5:** *In-vitro* neutralization assay. (A) Image of Green fluorescence protein (GFP)  
 918 expression after adeno-based SARS-CoV-2 pseudovirus neutralization assay from 2<sup>-4</sup> sample  
 919 dilution, (B) correlation between SARS-CoV-2 antibody from mice sera and intensity of GFP  
 920 in different experimental group. For treatment group with the decrease of the antibody  
 921 concentration, the intensity of GFP expression increased, which indicated the inhibition of  
 922 SARS-Cov-2 pseudovirus into ACE2 overexpressed HEK293 cell (ACE2-HEK293 cell), (C)  
 923 adeno-based SARS-CoV-2 pseudovirus neutralization percentage at different sample dilution,  
 924 (D) HIV-1 based SARS-CoV-2 pseudovirus copy number analysis by qPCR; all the samples  
 925 were compared by one-way ANNOVA method, \*\*\*\*= p-value< 0.0001.

926

927

928

929

930

931

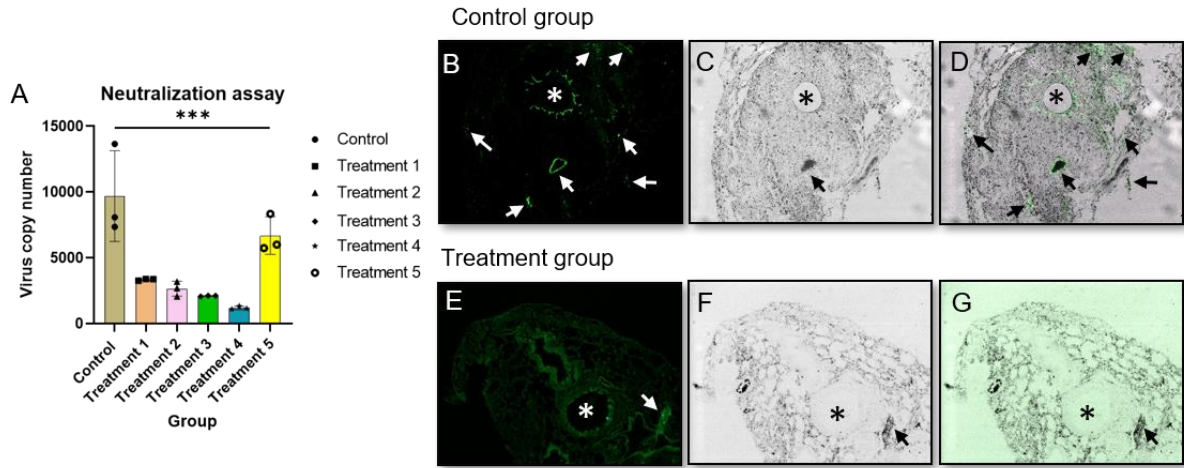

932

933 **Figure 6:** *In-vivo* neutralization assay, lung section, \* indicates trachea and arrow indicate  
934 infection. (A) (B) fluorescence image of lung section of control group mouse, (C) trans image  
935 of lung section of control group mouse, (D) overlay image of lung section of control group  
936 mouse, (E) fluorescence image of lung section of treatment group mouse, (F) trans image of  
937 lung section of treatment group mouse, (G) overlay image of lung section of treatment group  
938 mouse, intentional green color enhancement was done to observe any GFP intensity for panel  
939 G.

940

941

942

943

944

945

Supplementary Documents

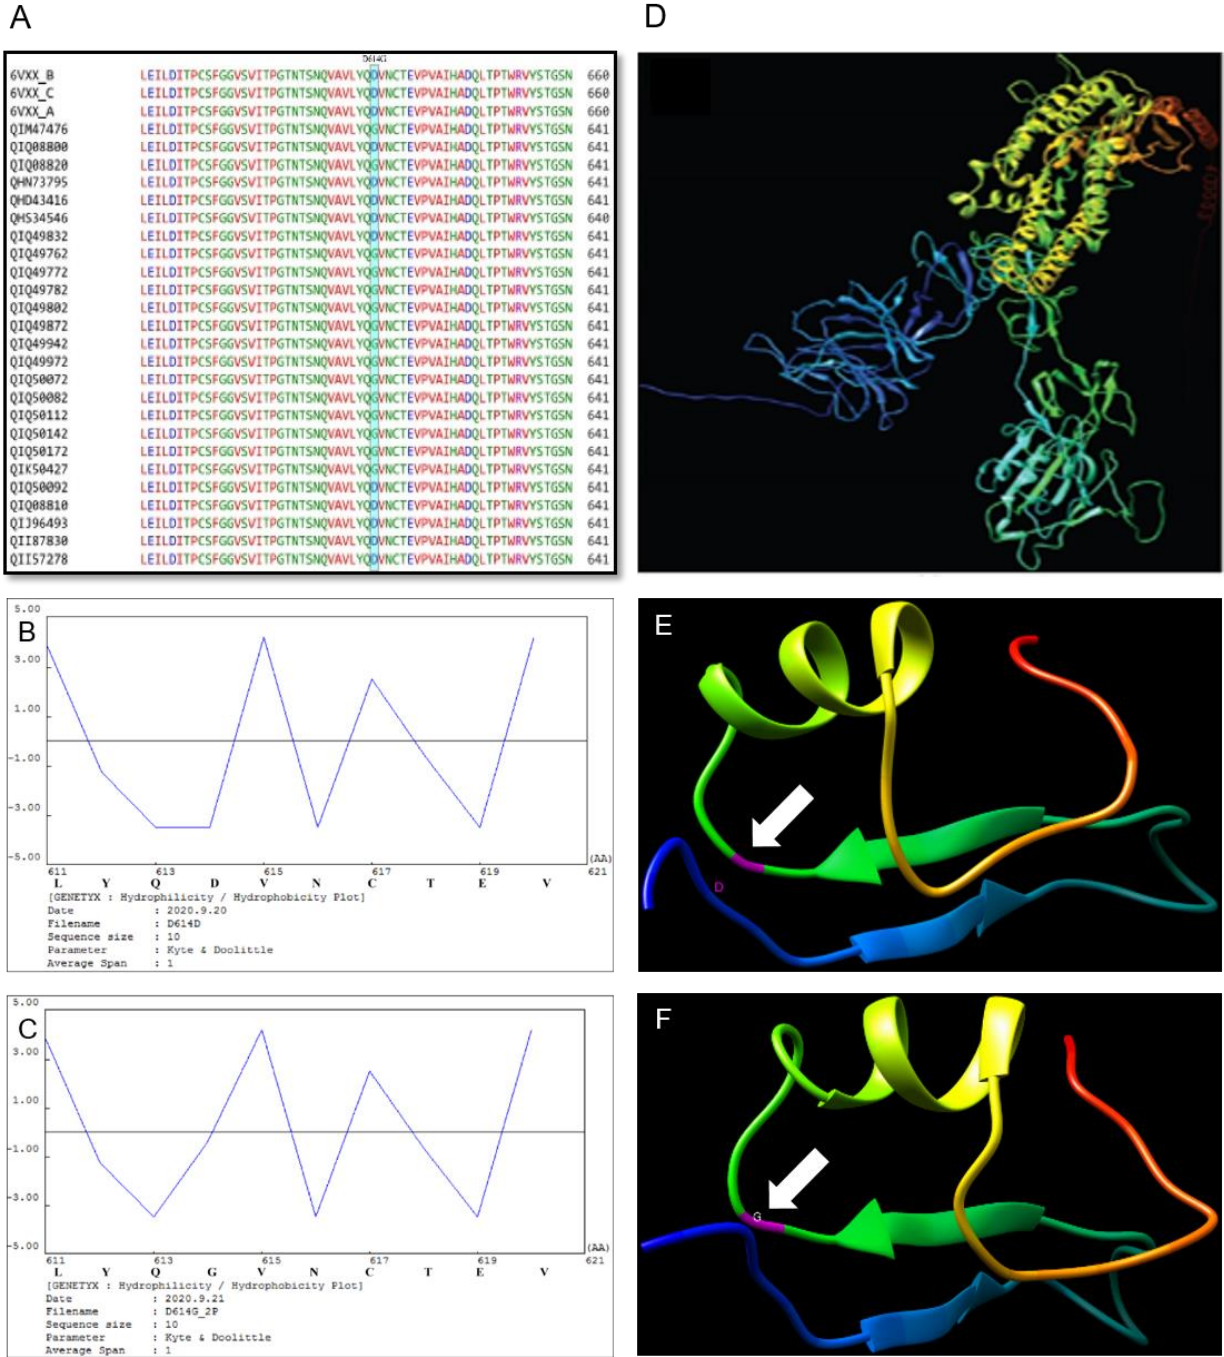

**Supplementary figure 1:** Target gene selection and modification; (A) Sequence alignment of SARS-CoV-2 surface glycoprotein, where D614 and G614 variants are visible, (B) hydrophilicity and hydrophobicity analysis of amino acid 611-620, where D614D is shown, (C) hydrophilicity and hydrophobicity analysis of amino acid 611-620, where D614G is shown (D) target sequence 3D model, (E) 3D model of amino acid 589-639; white arrow indicates D614D, (F) 3D model of amino acid 589-639; white arrow indicates D614G.



## Supplementary Documents

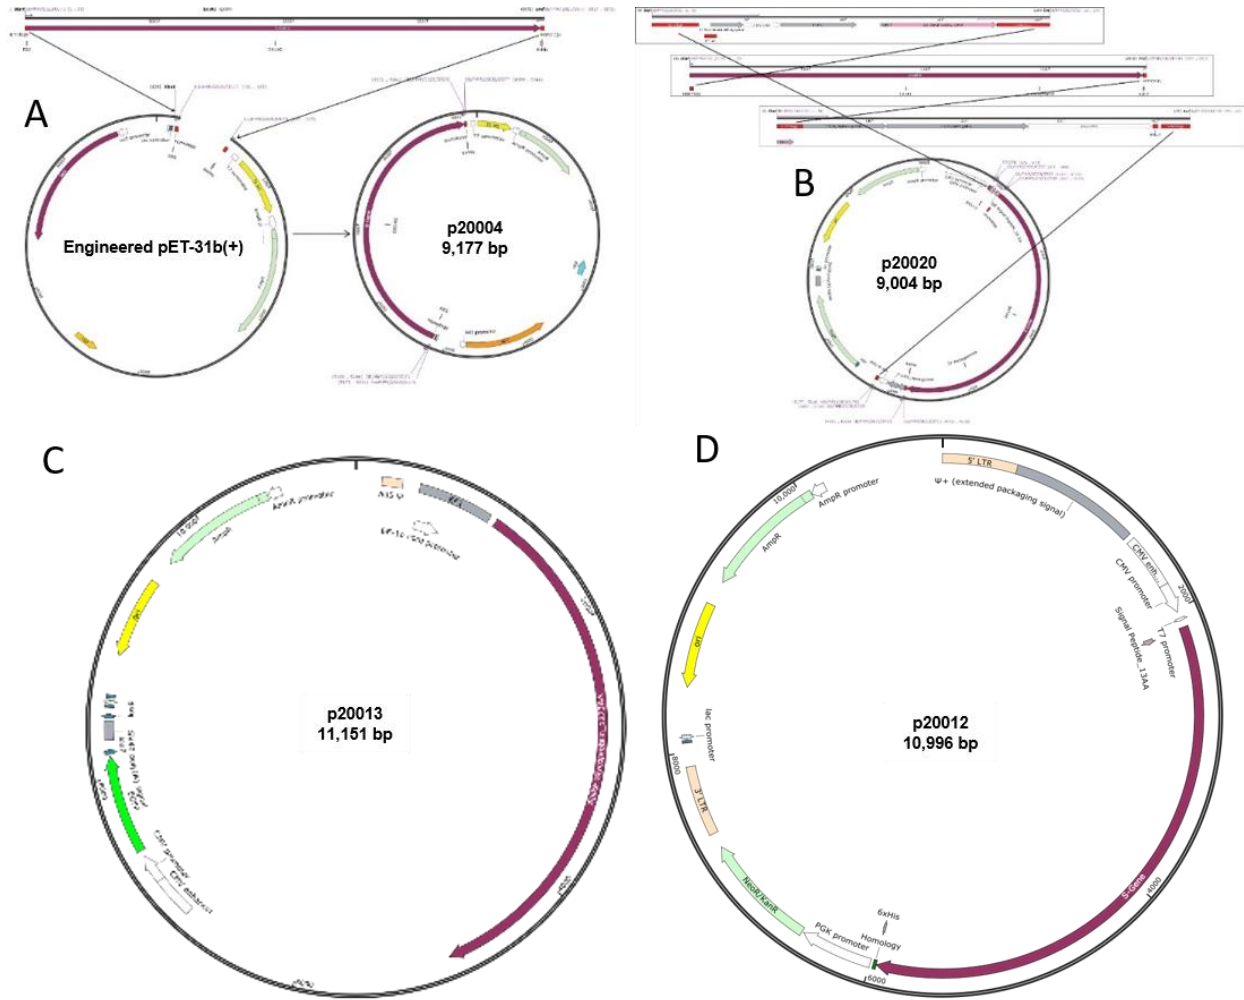

**Supplementary figure 2:** Vector construction and modification. (A) Graphical representation of S-gene and engineered pET31b vector assembly, (B) Graphical representation of p20010 rDNA molecular cloning, (C) Pseudotyped adenoviral rDNA p20013 map, containing EGFP along with S-gene, (D) Pseudotyped retroviral rDNA p20012 map, containing S-gene.

### Supplementary Documents

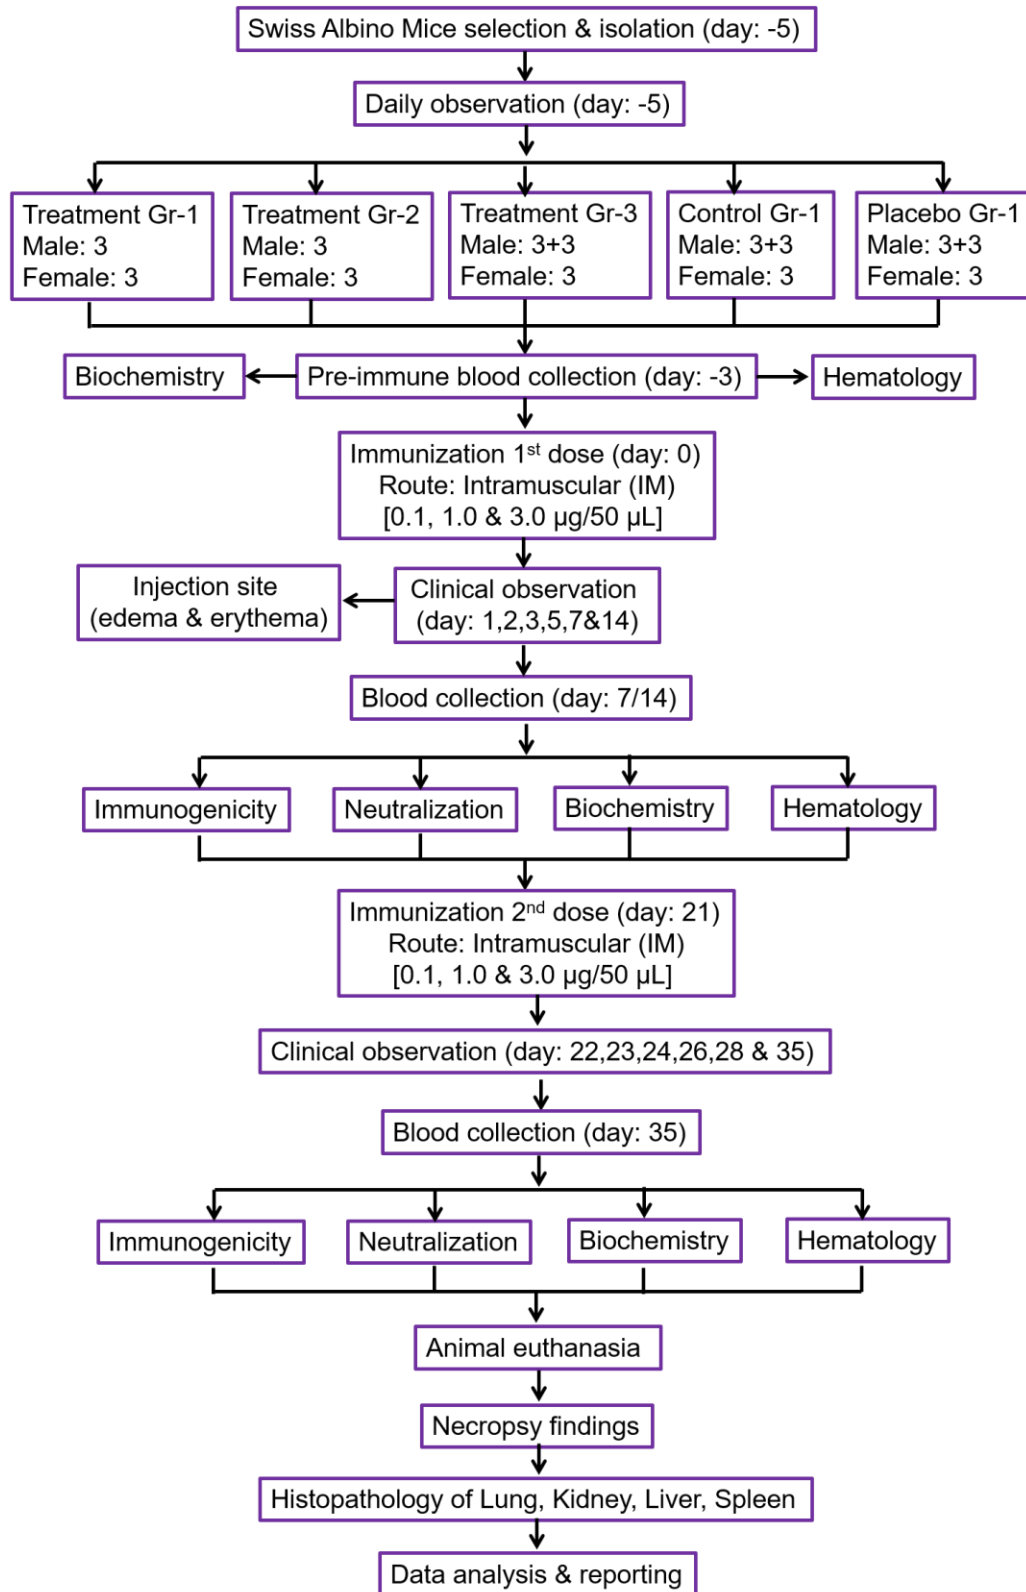

**Supplementary figure 3:** Experimental design for safety and efficacy analysis in mice.

## Supplementary Documents

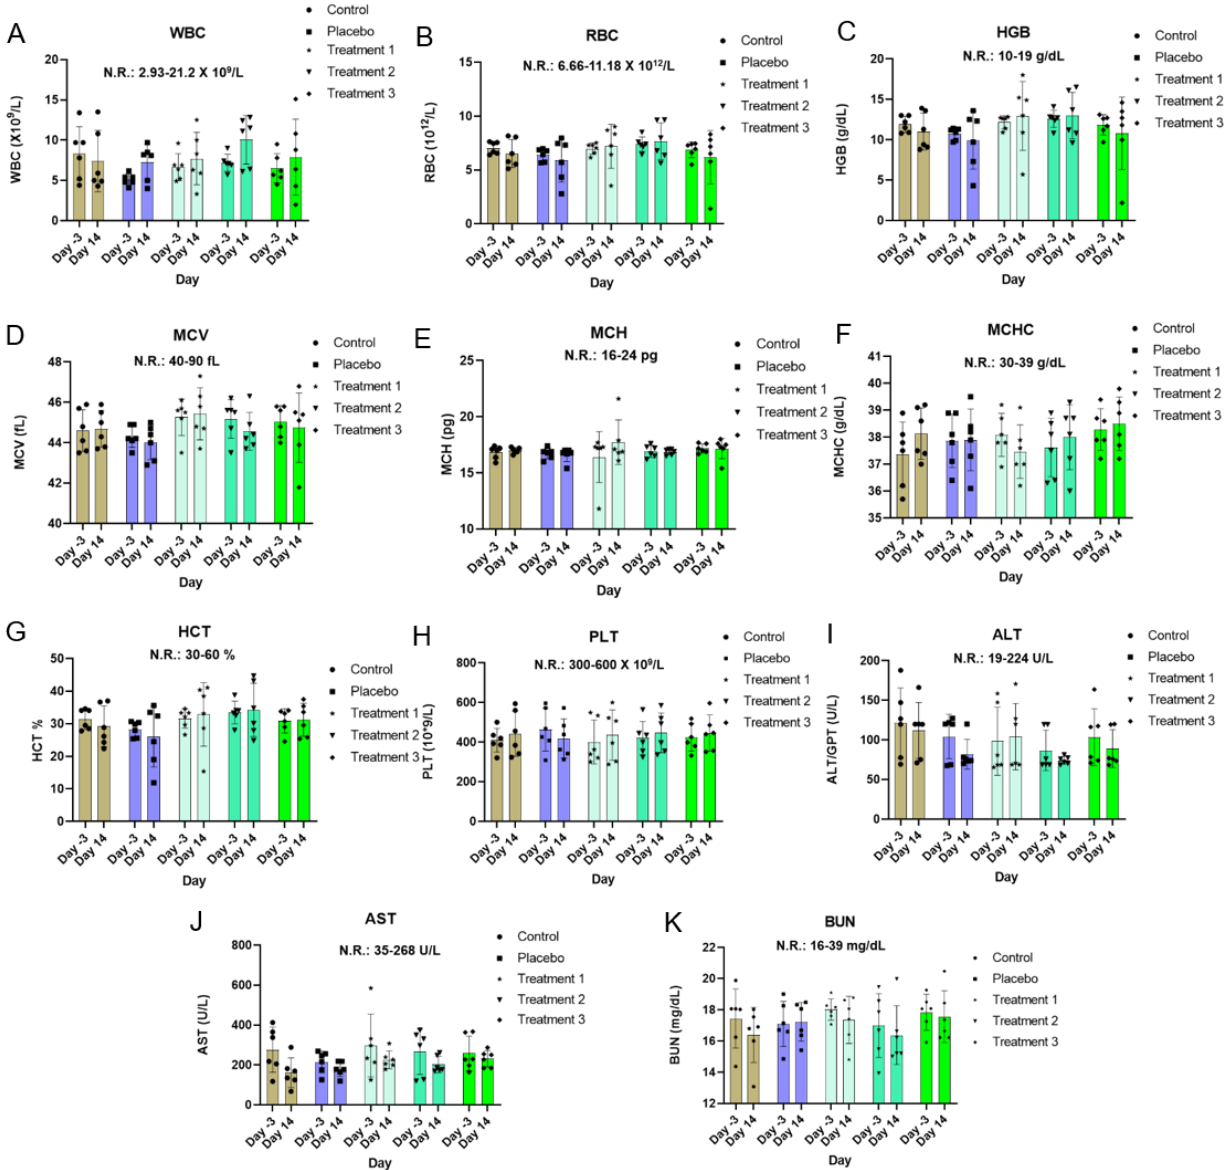

**Supplementary figure 4:** Toxicity analysis, Complete blood count and Chemistry analysis (A) WBC, white blood count (B) RBC, red blood cell (C) HGB, hemoglobin (D) MCV, mean corpuscular volume (E) MCH, mean corpuscular hemoglobin (F) MCHC, mean corpuscular hemoglobin concentration (G) HCT, hematocrit (H) PLT, platelet (I) ALT/GPT, alanine transaminase (J) AST/GOT, aspartate aminotransferase (K) BUN, blood urea nitrogen.

## Supplementary Documents

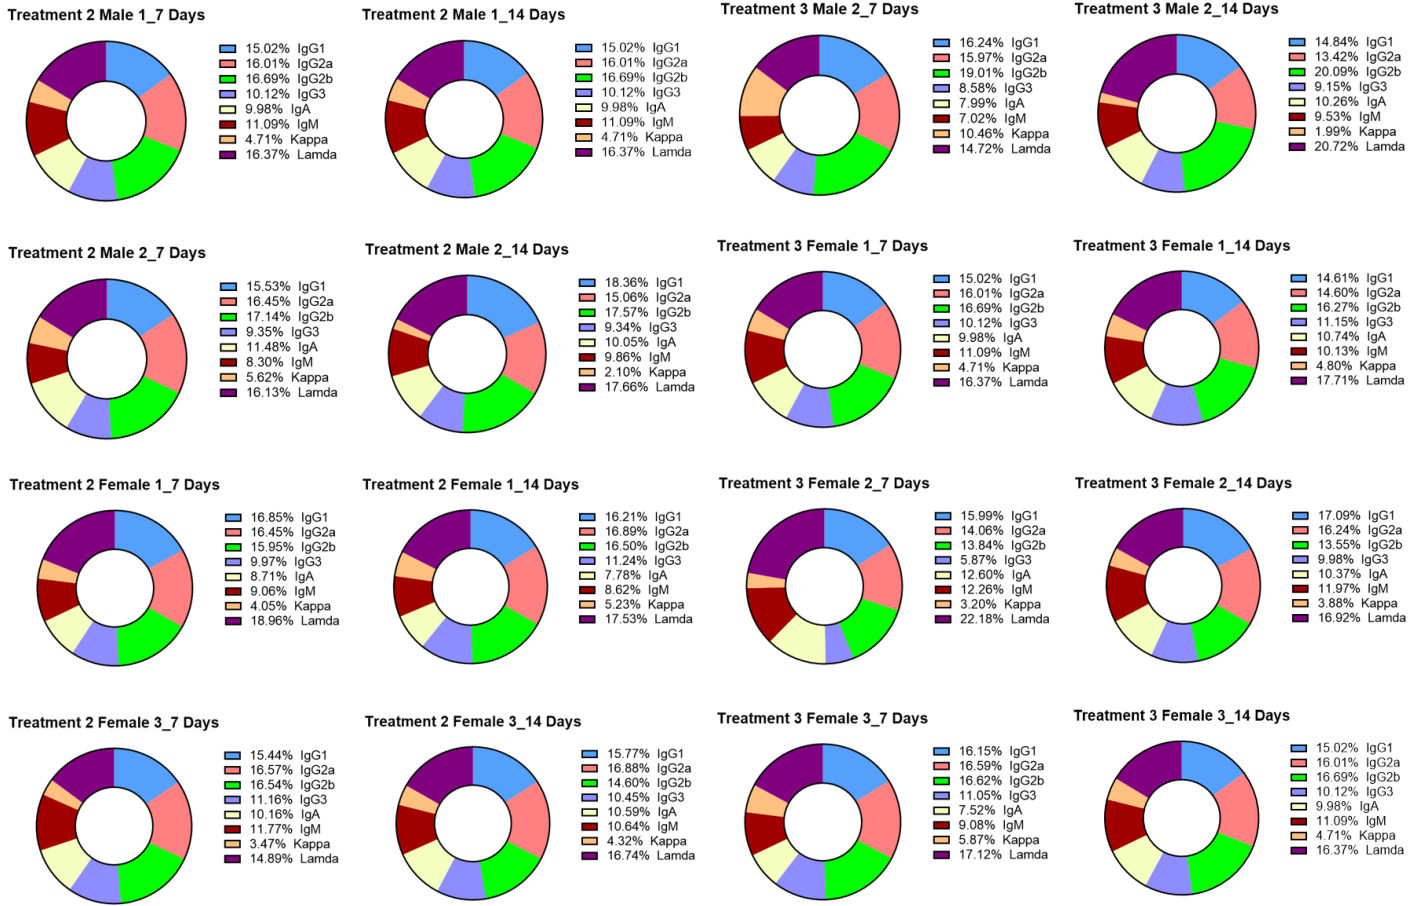

**Supplementary figure 5:** mAb isotyping of representative treatment group of mice, representative sample descriptions are mentioned in respective pie charts.

# Supplementary Documents

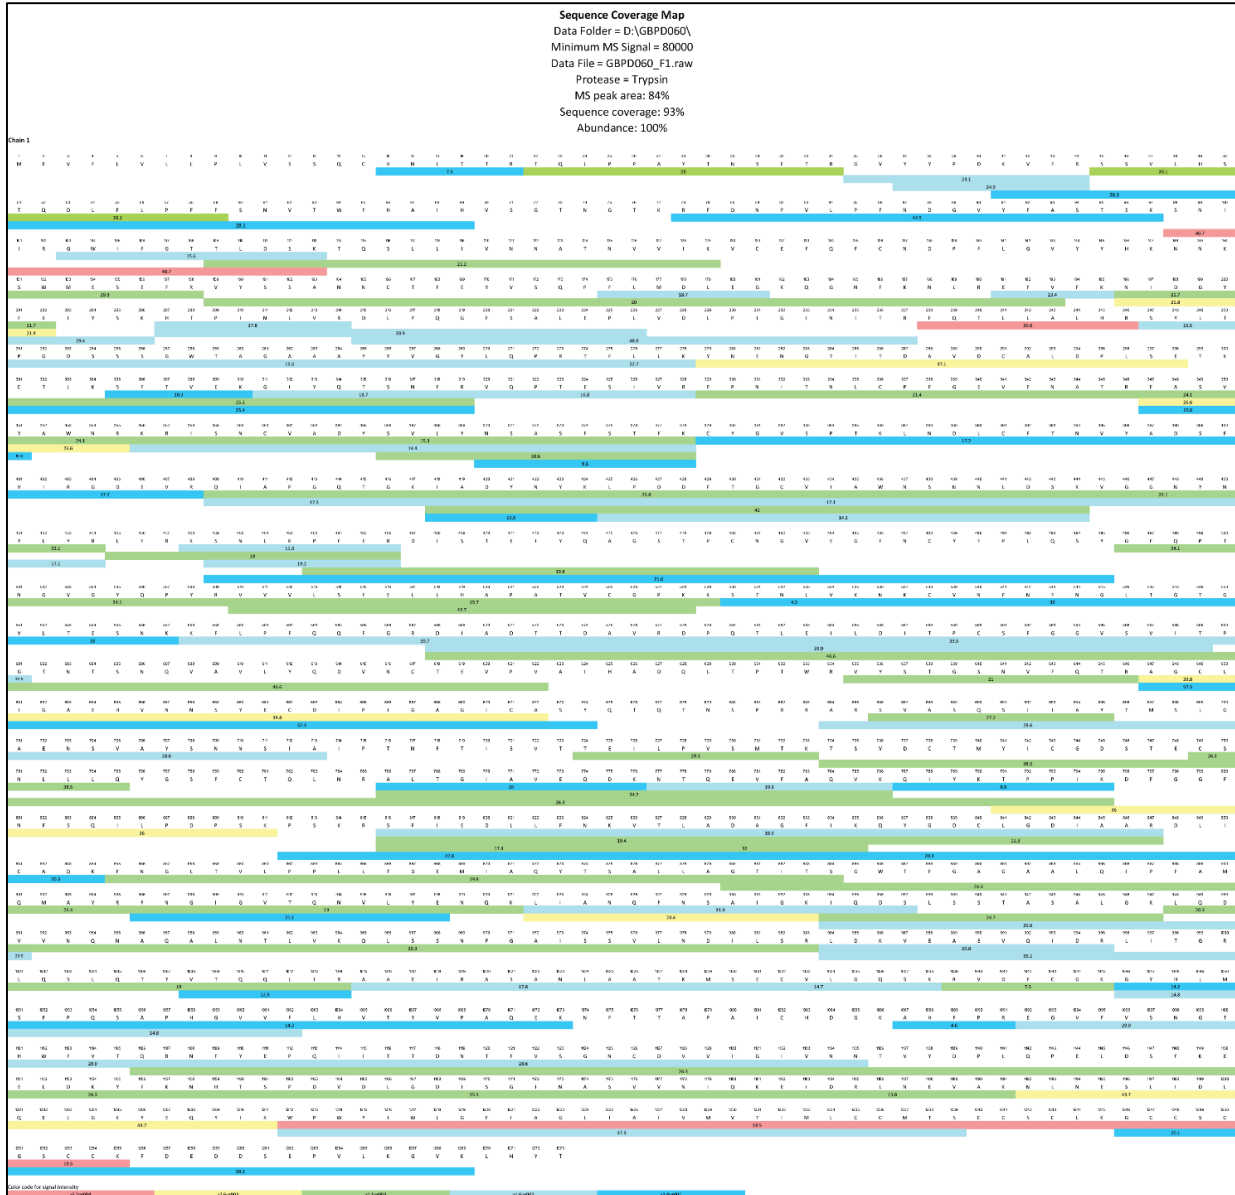

Supplementary figure 6: SARS-CoV-2 S protein mapping via LC-MS/MS.

## Supplementary Documents

The peptide masses from your sequence are:

| [Theoretical pI: 6.24 / Mw (average mass): 141178.47 / Mw (monoisotopic mass): 141088.40] |           |     |                                                           |
|-------------------------------------------------------------------------------------------|-----------|-----|-----------------------------------------------------------|
| mass                                                                                      | position  | #MC | peptide sequence                                          |
| 6124.0217                                                                                 | 578-634   | 0   | DPQTEILDITPCSFGGVSV ITPGTNTSNQVAVLYQDVNC TEVPAIHADQLTPTWR |
| 5418.7614                                                                                 | 855-905   | 0   | FNGLTVLPPLLTDEMIQYIT SALLAGTITSGWTFGAGAAL QIPFAMQMAYR     |
| 5021.5373                                                                                 | 886-733   | 0   | SVASQSIAYTMSLGAENSV AYSNNSIAIPTNFTSVTTE ILPVSMTK          |
| 4768.1395                                                                                 | 467-509   | 0   | DISTEIQAGSTPCNGVEGF NCFYFLQSYGFQPTNGVGYQ PYR              |
| 4719.2810                                                                                 | 1108-1149 | 0   | NFYEQIITDNTFVSGNCD VVIGVNNVTVDPLQPELDS FK                 |
| 3868.8726                                                                                 | 1212-1245 | 0   | WPWYIWLGFIAGLIANMVT IMLCCMTSCCCLK                         |
| 3752.7101                                                                                 | 647-682   | 0   | AGCLIGAEHVNNSEYCDIPI GAGICASYQTQNSPR                      |
| 3674.8390                                                                                 | 45-77     | 0   | SSVLHSTQDLFLPFFSNVTW FHAIHVSQGTNGTK                       |
| 3565.5412                                                                                 | 734-765   | 0   | TSVDCTMYICGDSSTECNLL LQYGSFCTQLNR                         |
| 3139.5822                                                                                 | 1046-1073 | 0   | GYHLMSFPQSAPHGVFLHV TYVPAQEK                              |
| 2838.3369                                                                                 | 247-273   | 0   | SYLTPGDSSTGWTAGAAAYY VGYLQPR                              |
| 2742.2425                                                                                 | 159-182   | 0   | VYSSANNCTFEYVQPFLLM LEQK                                  |
| 2493.2579                                                                                 | 1158-1181 | 0   | NHTSPDVLGDISGINASVW NIQK                                  |
| 2478.3602                                                                                 | 215-237   | 0   | DLPQGFSALEPLVDLPIGIN ITR                                  |
| 2380.3131                                                                                 | 1-21      | 0   | MFVFLVLLPLVSSQCVNLT R                                     |
| 2369.0813                                                                                 | 279-300   | 0   | YNENGTITDAVDCALDPLSE TK                                   |
| 2316.0852                                                                                 | 358-378   | 0   | ISNCVADYSVLYNSASFSTF K                                    |
| 2209.0230                                                                                 | 425-444   | 0   | LPDDFTGCVIAWNSNLDLSDK                                     |
| 2208.9881                                                                                 | 130-147   | 0   | VCFEFCNDPFLGVYYHK                                         |
| 2160.0284                                                                                 | 79-97     | 0   | FDPNVLFPNDGVYFVFASTK                                      |
| 2115.0175                                                                                 | 538-557   | 0   | CVNFNFNGLTGTGVLTESNK                                      |
| 2081.0338                                                                                 | 796-814   | 0   | DFGGFNFSQILPDPSPKPSK                                      |
| 2040.0007                                                                                 | 329-346   | 0   | FPNITNLCPFGEVFNATR                                        |
| 2021.0662                                                                                 | 965-983   | 0   | QLSSNFGAISVSLNDILSR                                       |
| 1989.9738                                                                                 | 387-403   | 0   | LNDLCFTMNYADSFVIR                                         |
| 1980.0986                                                                                 | 510-528   | 0   | VVLSFELLHAPATVCGPK                                        |
| 1868.0236                                                                                 | 948-964   | 0   | LQDVVNNQAQALNTLVK                                         |
| 1863.9136                                                                                 | 1092-1107 | 0   | EGVFNVSNGTHWFVTQR                                         |
| 1823.9286                                                                                 | 906-921   | 0   | FNGIGVTVGNVLYENQK                                         |
| 1727.0061                                                                                 | 114-129   | 0   | TQSLLVNNTATNVVVK                                          |
| 1690.9486                                                                                 | 1001-1014 | 0   | LQSLQTYVTQQLIR                                            |
| 1585.8431                                                                                 | 1192-1205 | 0   | NLINESLIDLQELGK                                           |
| 1495.7539                                                                                 | 22-34     | 0   | TQLPPAYTNSFTR                                             |
| 1377.7220                                                                                 | 934-947   | 0   | IQDLSSTASALGK                                             |
| 1374.6470                                                                                 | 1074-1086 | 0   | NFTTAPAIChDGK                                             |
| 1358.6699                                                                                 | 635-646   | 0   | VYSTGNSVFGTR                                              |
| 1293.5845                                                                                 | 1256-1266 | 0   | FDEDDSEPVLK                                               |
| 1281.5892                                                                                 | 836-847   | 0   | QYGDCLGDIAR                                               |
| 1275.7055                                                                                 | 922-933   | 0   | LIANQFNSAIGK                                              |
| 1225.6463                                                                                 | 816-825   | 0   | SFIEDLLFNK                                                |
| 1224.6259                                                                                 | 103-113   | 0   | GWIFGTTLDLSDK                                             |
| 1218.5902                                                                                 | 445-454   | 0   | VGGNYNYLYR                                                |
| 1163.6055                                                                                 | 777-786   | 0   | NTQEVFAQVK                                                |
| 1144.6208                                                                                 | 766-776   | 0   | ALTGIAVEQDK                                               |
| 1139.5996                                                                                 | 559-567   | 0   | FLPFQQFGR                                                 |
| 1113.5476                                                                                 | 347-355   | 0   | FASVYAWNR                                                 |
| 1098.6418                                                                                 | 238-246   | 0   | FQTLALHR                                                  |
| 1085.5374                                                                                 | 311-319   | 0   | GIYQTSNFR                                                 |
| 1081.5016                                                                                 | 1029-1038 | 0   | MSECVLGGQSK                                               |
| 1076.5218                                                                                 | 568-577   | 0   | DIADTTDAVR                                                |
| 1071.4564                                                                                 | 151-158   | 0   | SWMSEFR                                                   |
| 1058.5476                                                                                 | 987-995   | 0   | VEAEVQIDR                                                 |
| 1034.5880                                                                                 | 826-835   | 0   | VTLADAGFIK                                                |
| 1028.5735                                                                                 | 320-328   | 0   | VQPTESIVR                                                 |
| 990.5367                                                                                  | 459-466   | 0   | SNLKPFR                                                   |
| 950.2657                                                                                  | 1246-1255 | 0   | GCCSCGSCCK                                                |
| 949.5577                                                                                  | 207-214   | 0   | HTPINLVR                                                  |
| 899.4945                                                                                  | 409-417   | 0   | QIAPGQTGK                                                 |
| 886.4305                                                                                  | 418-424   | 0   | IADYNYK                                                   |
| 856.4199                                                                                  | 196-202   | 0   | NIDGYFK                                                   |
| 854.4076                                                                                  | 379-386   | 0   | CYGVSPTK                                                  |
| 846.4679                                                                                  | 1020-1028 | 0   | ASANLAATK                                                 |
| 843.4247                                                                                  | 1206-1211 | 0   | YEYIK                                                     |
| 841.4090                                                                                  | 35-41     | 0   | GVYYPDK                                                   |
| 790.4127                                                                                  | 848-854   | 0   | DLICAQK                                                   |
| 710.3719                                                                                  | 305-310   | 0   | SFTVEK                                                    |
| 673.3879                                                                                  | 1186-1191 | 0   | LNEVAK                                                    |
| 669.3606                                                                                  | 191-195   | 0   | EFVFK                                                     |
| 668.3072                                                                                  | 1040-1045 | 0   | VDFCGK                                                    |
| 661.3879                                                                                  | 530-535   | 0   | STNLVK                                                    |
| 633.3090                                                                                  | 1150-1154 | 0   | EELDK                                                     |
| 627.3361                                                                                  | 1087-1091 | 0   | AHFPR                                                     |
| 621.3970                                                                                  | 274-278   | 0   | TFLK                                                      |
| 602.3620                                                                                  | 98-102    | 0   | SNIR                                                      |
| 593.3042                                                                                  | 183-187   | 0   | QGNFK                                                     |
| 575.2783                                                                                  | 404-408   | 0   | GDEVK                                                     |
| 559.3562                                                                                  | 996-1000  | 0   | LITGR                                                     |
| 559.3198                                                                                  | 1015-1019 | 0   | AAEIR                                                     |
| 555.3500                                                                                  | 791-795   | 0   | TPPIK                                                     |
| 551.3188                                                                                  | 787-790   | 0   | QIYK                                                      |
| 533.2718                                                                                  | 1270-1273 | 0   | LHYT                                                      |
| 532.2725                                                                                  | 1182-1185 | 0   | EIDR                                                      |
| 510.2922                                                                                  | 203-206   | 0   | IYSK                                                      |

97.0% of sequence covered (you may modify the input parameters to display also peptides < 500 Da or > 10000000000 Da).

**Supplementary figure 7: SARS-CoV-2 S protein mapping via ExPASy PeptideMass.**

## Supplementary Documents

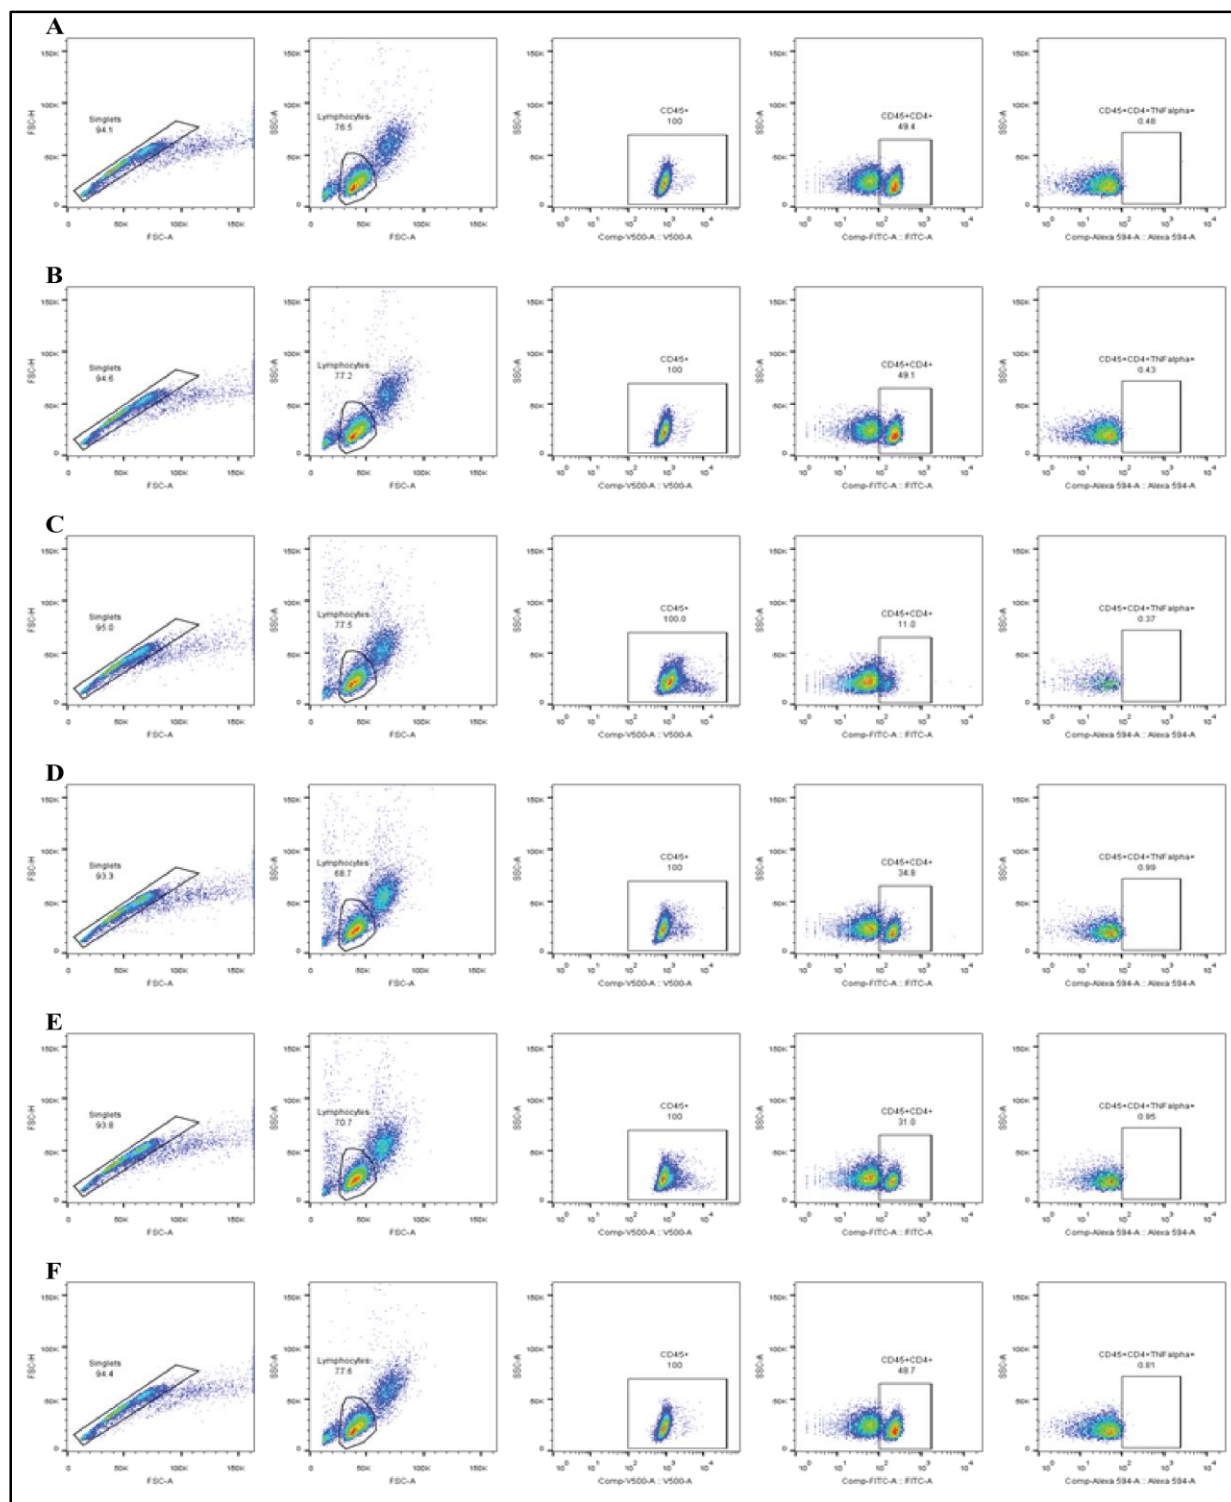

**Supplementary figure 8:** Flow cytometric analysis of total T cell ( $CD4^+$ ) populations producing TFN alpha on mouse splenocyte upon SARS-CoV-2 S protein stimulation. Cells were gated in an orderly manner, like singlets were gated, followed by lymphocytes,  $CD45^+$ ,  $CD45^+CD4^+$  and  $CD45^+CD4^+TFN\alpha^+$  (A, B, C) 3 control panels where 0.48%, 0.43% and 0.37%  $CD45^+CD4^+TFN\alpha^+$  cells were identified respectively, (D, E, F) 3 treatment panels where 0.99%, 0.95% and 0.81%  $CD45^+CD4^+TFN\alpha^+$  cells were identified respectively.

## Supplementary Documents

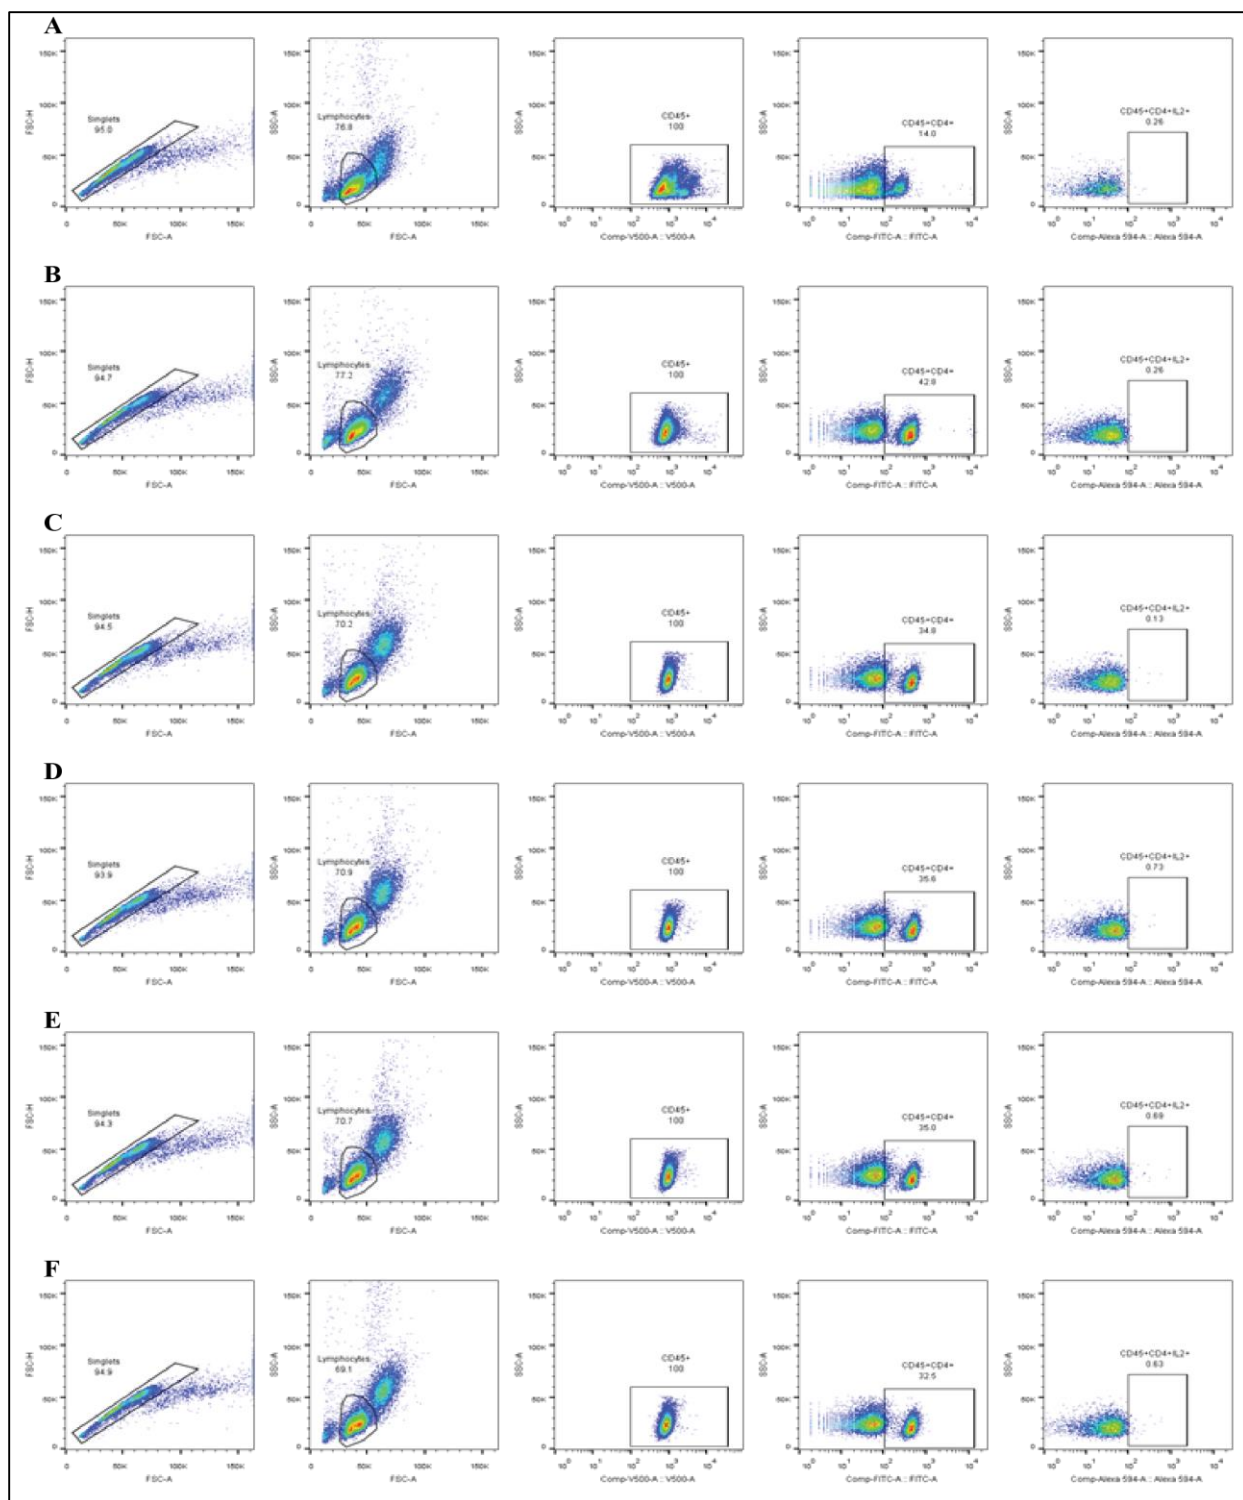

**Supplementary figure 9:** Flow cytometric analysis of total T cell ( $CD4^+$ ) populations producing IL-2 on mouse splenocyte upon SARS-CoV-2 S protein stimulation. Cells were gated in an orderly manner, like singlets were gated, followed by lymphocytes,  $CD45^+$ ,  $CD45^+CD4^+$  and  $CD45^+CD4^+IL2^+$  (A, B, C) 3 control panels where 0.26%, 0.26% and 0.13%  $CD45^+CD4^+IL2^+$  cells were identified respectively, (D, E, F) 3 treatment panels where 0.73%, 0.69% and 0.63%  $CD45^+CD4^+IL2^+$  cells were identified respectively.



## Supplementary Documents

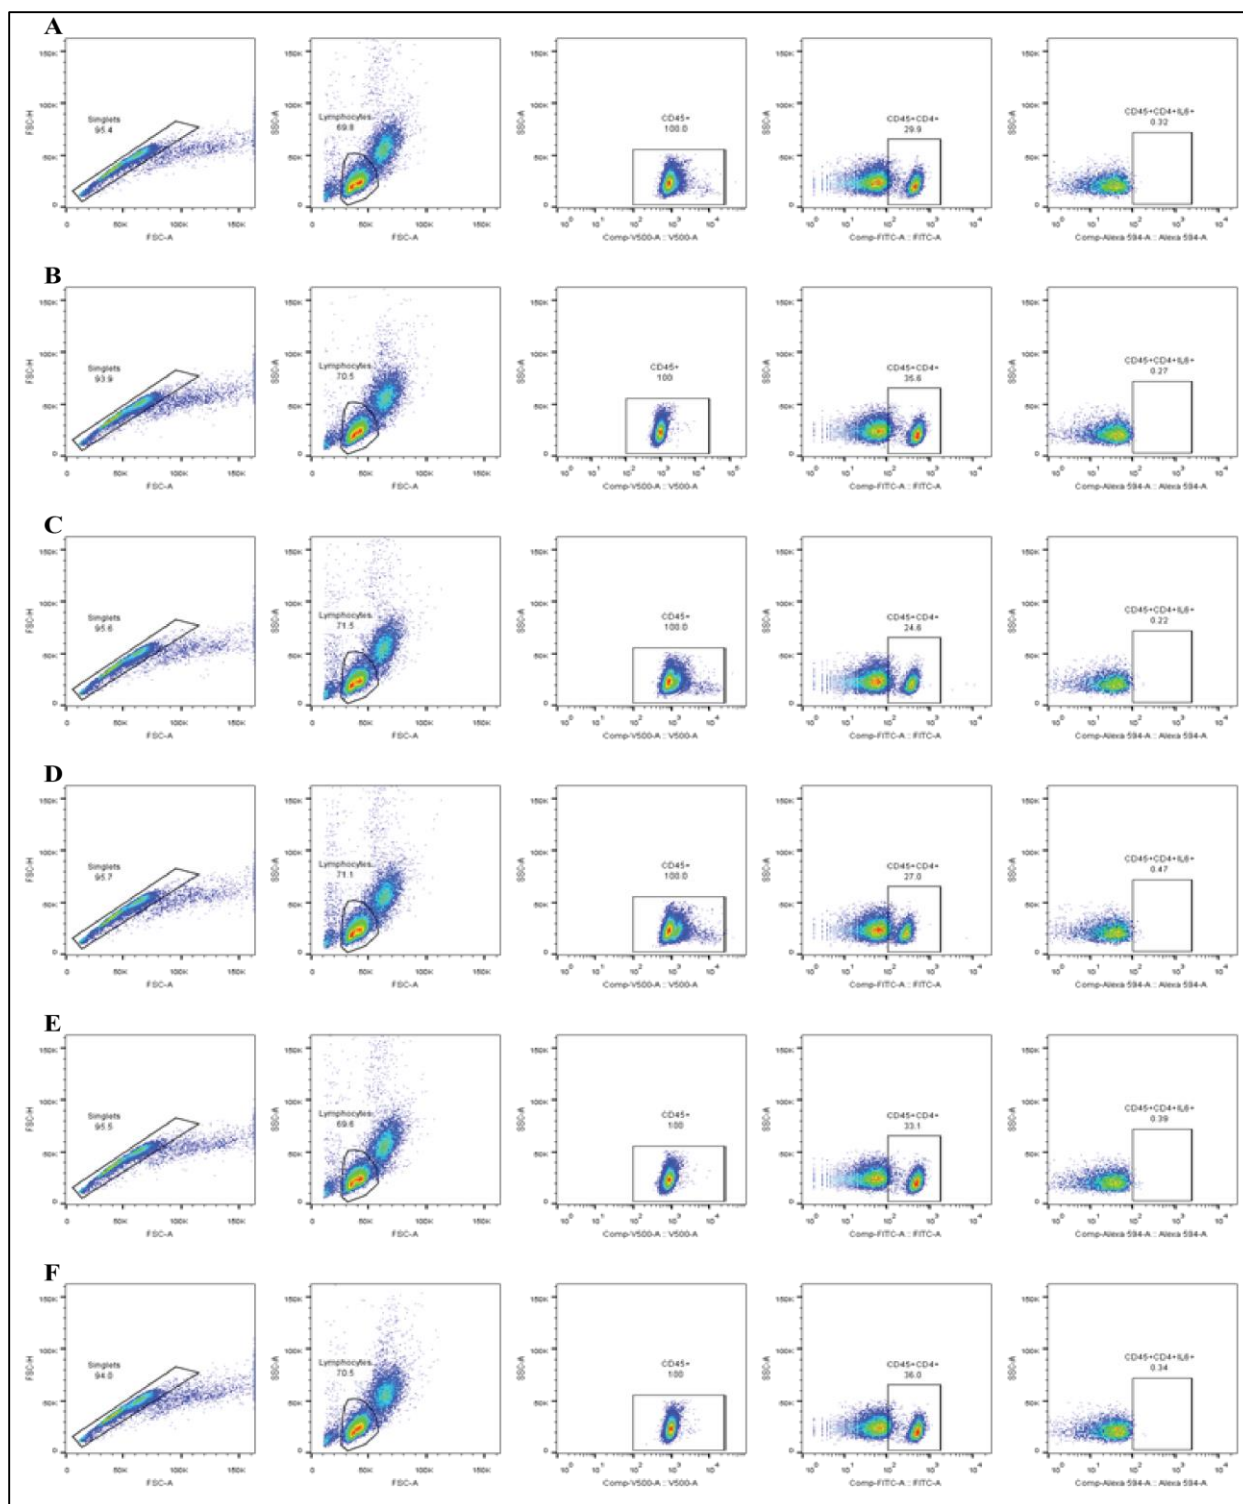

**Supplementary figure 10:** Flow cytometric analysis of total T cell (CD4<sup>+</sup>) populations producing IL-6 on mouse splenocyte upon SARS-CoV-2 S protein stimulation. Cells were gated in an orderly manner, like singlets were gated, followed by lymphocytes, CD45<sup>+</sup>, CD45<sup>+</sup>CD4<sup>+</sup> and CD45<sup>+</sup>CD4<sup>+</sup>IL6<sup>+</sup> (A, B, C) 3 control panels where 0.32%, 0.27% and 0.22% CD45<sup>+</sup>CD4<sup>+</sup>IL6<sup>+</sup> cells were identified respectively, (D, E, F) 3 treatment panels where 0.47%, 0.39% and 0.34% CD45<sup>+</sup>CD4<sup>+</sup>IL6<sup>+</sup> cells were identified respectively.

## Supplementary Documents

**Supplementary table 1:** assembly, amplification, engineering and mutagenesis primers

| Name                                              | Primer ID        | Primer Sequence (5' > 3')                                      |
|---------------------------------------------------|------------------|----------------------------------------------------------------|
| S-outer (forward primer)                          | GB/PMR/2020/0572 | atcttgcaaacaccacgcgaac                                         |
| S-outer (reverse primer)                          | GB/PMR/2020/0573 | aagccatccgaaagggagtga                                          |
| S-full and S-full.direct (forward primer)         | GB/PMR/2020/0574 | atgtttgttttctgtttattgccactagt                                  |
| S-full and S-full.direct (reverse primer)         | GB/PMR/2020/0575 | ttatgtgtaatgtaattgactcctttgagca                                |
| S-homology and S-homology.direct (forward primer) | GB/PMR/2020/0576 | ttaactttaagaaggagatatacatatgtttgttttctgtttattgccactagt         |
| S-homology and S-homology.direct (reverse primer) | GB/PMR/2020/0577 | atctcagtggtggtggtggtggtgttatgtgtaatgtaattgactcctttgagca        |
| eng.pET31b (forward primer)                       | GB/PMR/2020/0570 | caccaccaccaccactga                                             |
| eng.pET31b (reverse primer)                       | GB/PMR/2020/0571 | atgtatatccttcttaagttaacaaaattattct                             |
| S-PCR (forward prime)                             | GB/PMR/2020/0600 | agagctgcagaaatcagagcttct                                       |
| S-PCR (reverse primer)                            | GB/PMR/2016/0024 | gctagttattgctcagcgg                                            |
| H1 signal peptide (assembly primer F1)            | GB/PMR/2020/0583 | agaaataattttgttaactttaagaaggagatatacatatggagttggactgagc        |
| H1 signal peptide (assembly primer R1)            | GB/PMR/2020/0584 | acaactggacaccttttaaaatagccaaaaggaaaaatccagctcagtcctcaactccatag |
| H1 signal peptide (assembly primer F2)            | GB/PMR/2020/0585 | ggctattttaaaagggtgccagtgctcagtggttaattcttacaaccagaactcaatta    |
| H1 signal peptide (assembly primer R2)            | GB/PMR/2020/0586 | tgtgaaagaattagtgatgcaggggtaattgagttctggttgtaagattaaca          |
| H1 signal peptide (amplification forward primer)  | GB/PMR/2020/0583 | agaaataattttgttaactttaagaaggagatatacatatggagttggactgagc        |
| H1 signal peptide (amplification reverse primer)  | GB/PMR/2020/0586 | tgtgaaagaattagtgatgcaggggtaattgagttctggttgtaagattaaca          |
| p20004 engineering (forward primer)               | GB/PMR/2020/0582 | cagtggttaattcttacaaccagaact                                    |
| p20004 engineering (reverse primer)               | GB/PMR/2020/0571 | atgtatatccttcttaagttaacaaaattattct                             |
| S-Gene of p20006 (forward primer)                 | GB/PMR/2020/0594 | taaggtaccgccaccatggagttgggactgagctgga                          |
| S-Gene of p20006 (reverse primer)                 | GB/PMR/2020/0592 | aatactcagtcagtggtggtggtggtggtg                                 |
| 2P mutagenesis (forward primer)                   | GB/PMR/2020/0745 | cctcctgaggctgaagtcaaattgataggtt                                |
| 2P mutagenesis (reverse primer)                   | GB/PMR/2020/0746 | ttcagcctcaggagggtcaagacgtgaaa                                  |
| 5'-UTR (assembly primer F1)                       | GB/PMR/2020/0723 | ctaactagagaaccactgcttacaatggcgcctggcttatcgaaattaatacga         |

### Supplementary Documents

|                                         |                  |                                                                                                                                                                                                  |
|-----------------------------------------|------------------|--------------------------------------------------------------------------------------------------------------------------------------------------------------------------------------------------|
| 5'-UTR (assembly primer R1)             | GB/PMR/2020/0724 | actcttctttctctcttatttccctatagtgagtcgtattaatttcgataa gccagg                                                                                                                                       |
| 5'-UTR (assembly primer F2)             | GB/PMR/2020/0725 | gggaaataagagagaaaaagaagagtaagaagaatataagagct agcggtagccg                                                                                                                                         |
| 5'-UTR (assembly primer R2)             | GB/PMR/2020/0726 | aagaagaggatccagggtccagtcctatgggtggcggtaccgctagc tcttata                                                                                                                                          |
| 5'-UTR (assembly primer F3)             | GB/PMR/2020/0727 | tggacctggatcctcttcttgggtggcagcagccacgcgagtcact cccagtggtt                                                                                                                                        |
| 5'-UTR (assembly primer R3)             | GB/PMR/2020/0728 | agttctggttgtaagattaacacactgggagtgaggact                                                                                                                                                          |
| 5'-UTR (amplification forward primer)   | GB/PMR/2020/0723 | ctaactagagaaccactgcttacaatggcgcctggcttatcgaaa ttaatacga                                                                                                                                          |
| 5'-UTR (amplification reverse primer)   | GB/PMR/2020/0728 | agttctggttgtaagattaacacactgggagtgaggact                                                                                                                                                          |
| 3'-UTR (assembly primer F1)             | GB/PMR/2020/0731 | caccaccaccaccactgactcagggtggagcctcgggtggc catgcttctt                                                                                                                                             |
| 3'-UTR (assembly primer R1)             | GB/PMR/2020/0732 | tgcaggaaggggaggaggggctggggggaggcccaaggggca aagaagcatggccaccga                                                                                                                                    |
| 3'-UTR (assembly primer F2)             | GB/PMR/2020/0733 | tctccccctctgcaccctacccccgggtctttgagatctggtta ccac                                                                                                                                                |
| 3'-UTR (assembly primer R2)             | GB/PMR/2020/0734 | tccattcgggtgttcttgaggctggttagtggttaaccagatctcaaa ga                                                                                                                                              |
| 3'-UTR (assembly primer F3)             | GB/PMR/2020/0735 | tcaagaacacccgaatggagtctctaagctacataataccaactta ca                                                                                                                                                |
| 3'-UTR (assembly primer R3)             | GB/PMR/2020/0736 | ttttgggggacaacattttgtaaagtgaagttggtattatgtagctta                                                                                                                                                 |
| 3'-UTR (assembly primer F4)             | GB/PMR/2020/0737 | acaaaaatggtgcccccaaatgtagccattcgtatctgctcc                                                                                                                                                       |
| 3'-UTR (assembly primer R4)             | GB/PMR/2020/0738 | agaatgtgaagaaactttttggcaacggagcagatacgaatgg ct                                                                                                                                                   |
| 3'-UTR (assembly primer F5)             | GB/PMR/2020/0739 | ccaaagaaagtttctcacattctaaaaaaaaaaaaaaaaaaaaaaaa aaaaaaaaaaaaaaaaaaaaaaaaaaaaaaaaaaaaaaaaaaaaaaaaa aaaaaaaaaaaaaaaaaaaaaaaaaaaaaaaaaaaaaaaaaaaaaaaaa aaaaaaaaaaaaaaaaaaaaaaaaaaaaggcgcccctcttctga |
| 3'-UTR (assembly primer R5)             | GB/PMR/2020/0740 | agccccagctggttcttccgcctcagaagagggggcgcct                                                                                                                                                         |
| p20020 S-gene (forward primer)          | GB/PMR/2020/0582 | cagtgtgtaatttacaaccagaact                                                                                                                                                                        |
| p20020 S-gene (forward primer)          | GB/PMR/2020/0730 | ctcagtcagtggtggtggtggtggtg                                                                                                                                                                       |
| pcDNA5/FRT engineering (forward primer) | GB/PMR/2020/0729 | cttctgaggcggaaagaaccagctggggct                                                                                                                                                                   |
| pcDNA5/FRT engineering (forward primer) | GB/PMR/2020/0722 | gtaagcagtggttctctagtag                                                                                                                                                                           |

## Supplementary Documents

**Supplementary table 2:** sequencing primers

| Name                                   | Primer ID        | Primer Sequence (5' > 3')   |
|----------------------------------------|------------------|-----------------------------|
| p20004, p20006 sequencing primers (F1) | GB/PMR/2016/0023 | taatacgactcactataggg        |
| p20004, p20006 sequencing primers (F2) | GB/PMR/2020/0595 | tactacttttagattcgaagaccagct |
| p20004, p20006 sequencing primers (F3) | GB/PMR/2020/0596 | tggaaccattacagatgctgtagact  |
| p20004, p20006 sequencing primers (F4) | GB/PMR/2020/0597 | caactgaaatctatcaggccggt     |
| p20004, p20006 sequencing primers (F5) | GB/PMR/2020/0598 | tgcaggctgtttaataggggct      |
| p20004, p20006 sequencing primers (F6) | GB/PMR/2020/0599 | tgacacttcagatgctggctt       |
| p20004, p20006 sequencing primers (F7) | GB/PMR/2020/0600 | agagctgcagaaatcagagcttct    |
| p20004, p20006 sequencing primers (R1) | GB/PMR/2016/0024 | gctagtattgctcagcgg          |
| p20010, p20015 sequencing primers (F1) | GB/PMR/2016/0023 | taatacgactcactataggg        |
| p20010, p20015 sequencing primers (F2) | GB/PMR/2020/0595 | tactacttttagattcgaagaccagct |
| p20010, p20015 sequencing primers (F3) | GB/PMR/2020/0596 | tggaaccattacagatgctgtagact  |
| p20010, p20015 sequencing primers (F4) | GB/PMR/2020/0597 | caactgaaatctatcaggccggt     |
| p20010, p20015 sequencing primers (F5) | GB/PMR/2020/0598 | tgcaggctgtttaataggggct      |
| p20010, p20015 sequencing primers (F6) | GB/PMR/2020/0599 | tgacacttcagatgctggctt       |
| p20010, p20015 sequencing primers (F7) | GB/PMR/2020/0600 | agagctgcagaaatcagagcttct    |
| p20010, p20015 sequencing primers (R1) | GB/PMR/2017/0027 | tagaaggcacagtcgagg          |
| p20013 sequencing primers (F1)         | GB/PMR/2020/0452 | agggtgggggagaaccgtat        |
| p20020 sequencing primers (F1)         | GB/PMR/2018/0095 | cgcaaatggcggttaggcgtg       |
| p20020 sequencing primers (F2)         | GB/PMR/2020/0595 | tactacttttagattcgaagaccagct |
| p20020 sequencing primers (F3)         | GB/PMR/2020/0596 | tggaaccattacagatgctgtagact  |
| p20020 sequencing primers (F4)         | GB/PMR/2020/0597 | caactgaaatctatcaggccggt     |
| p20020 sequencing primers (F5)         | GB/PMR/2020/0598 | tgcaggctgtttaataggggct      |
| p20020 sequencing primers (F6)         | GB/PMR/2020/0599 | tgacacttcagatgctggctt       |
| p20020 sequencing primers (F7)         | GB/PMR/2020/0600 | agagctgcagaaatcagagcttct    |
| p20020 sequencing primers (R1)         | GB/PMR/2020/0749 | accacaccgccgcgcttaat        |

**Supplementary table 3:** real-time PCR primers

| Name                      | Primer ID        | Primer Sequence (5' > 3')        |
|---------------------------|------------------|----------------------------------|
| Real-Time PCR primer (F1) | GB/PMR/2020/0601 | aatctctcatcgatctccaagaact        |
| Real-Time PCR primer (R1) | GB/PMR/2020/0575 | ttatgtgtaatgtaatttgactcctttgagca |
| Real-Time PCR primer (F2) | GB/PMR/2020/0751 | tgctcaaaggagtcaaattac            |
| Real-Time PCR primer (R2) | GB/PMR/2020/0752 | aagaagcatggccaccga               |

**Supplementary method 1:** IVT mRNA synthesis optimization

### *DNA preparation for IVT reaction*

30 µg of p20020 rDNA was restriction digested with SfoI (ThermoFisher, USA) for 16 hours, visualized using 0.8% agarose gel electrophoresis, gel excised and DNA extracted from gel using GeneJET Gel Extraction and DNA Cleanup Micro Kit, re-purification of DNA by phenol:chloroform:isoamyl alcohol, followed by phenol removal using chloroform (twice). Purified lyophilized DNA was reconstituted using nuclease-free water, quantified and store at -30 °C for future use.

## Supplementary Documents

### Optimization step 1: Synthesis time factor

240 ng linear purified DNA was used for all 4 optimization reactions. Each reaction was performed in a 20  $\mu$ L total volume. For every reaction, a DNase treatment reaction was also performed using 1  $\mu$ L TURBO DNase (2 U/ $\mu$ L) at 37 °C for 15 minutes. For visualization, 1% agarose gel electrophoresis was performed after every step of reaction (**figure 1C**).

In optimization step 1, where synthesis time dependency was observed, for that following components were mixed together apart from water and template, and reaction were run for 2, 4, 6, 8, 10 and 16 hours. 3 control reactions were also performed (1  $\mu$ g control template pTRI-Xef for each reaction) for 2, 4 and 16 hours at 37 °C.

| Items               | Final conc. |
|---------------------|-------------|
| ATP                 | 7.5 mM      |
| UTP                 | 7.5 mM      |
| GTP                 | 7.5 mM      |
| CTP                 | 7.5 mM      |
| 10X reaction buffer | 1X          |
| 10X enzyme mix      | 1X          |

### Optimization step 2: rNTPs concentration

In 2<sup>nd</sup> step of optimization, where rNTPs concentration was observed at a constant synthesis time (2 hours) at 37 °C. For that following components were mixed together apart from water and template. As this point, last optimized condition was run as positive control.

| Items               | Final conc. |        |         |         |
|---------------------|-------------|--------|---------|---------|
| ATP                 | 7.5 mM      | 13 mM  | 16.5 mM | 21.5 mM |
| UTP                 | 7.5 mM      | 13 mM  | 16.5 mM | 21.5 mM |
| GTP                 | 7.5 mM      | 8.0 mM | 10 mM   | 13.5 mM |
| CTP                 | 7.5 mM      | 7.5 mM | 9.5 mM  | 12.5 mM |
| 10X reaction buffer | 1X          | 1X     | 1X      | 1X      |
| 10X enzyme mix      | 1X          | 1X     | 1X      | 1X      |

### Optimization step 3: RNase inhibitor and pyrophosphatase effect

In 3<sup>rd</sup> step of optimization, murine RNase inhibitor and yeast pyrophosphatase effects were observed at a constant synthesis time (2 hours) and constant rNTPs at 37 °C. For that following components were mixed together apart from water and template. A higher concentration of rNTPs reaction was setup. As this point, last optimized condition was run as positive control.

## Supplementary Documents

| Items                                | Final conc.      |                  |
|--------------------------------------|------------------|------------------|
| ATP                                  | 7.5 mM           | 13.13 mM         |
| UTP                                  | 7.5 mM           | 13.13 mM         |
| GTP                                  | 7.5 mM           | 9.38 mM          |
| CTP                                  | 7.5 mM           | 9.38 mM          |
| 10X reaction buffer                  | 1X               | 1X               |
| 10X enzyme mix                       | 1X               | 1X               |
| RNase inhibitor, Murine              | 1 U/ $\mu$ L     | 1 U/ $\mu$ L     |
| Pyrophosphatase, inorganic yeast     | 0.002 U/ $\mu$ L | 0.002 U/ $\mu$ L |
| Figure 1C, lane number $\rightarrow$ | 1 & 2            | 3 & 4            |

### Optimization step 4: Temperature dependency

In 4<sup>th</sup> step of optimization, temperature dependency was observed at a constant synthesis time (2 hours), constant rNTPs, and constant RNase inhibitor and pyrophosphatase, and at 38, 37, 36, 35, 34 and 33 °C. For that following components were mixed together apart from water and template. A higher concentration of rNTPs reaction was also setup. As this point, last optimized condition was run as positive control.

| Items                               | Final conc.      |                  |
|-------------------------------------|------------------|------------------|
| ATP                                 | 13.13 mM         | 21.5 mM          |
| UTP                                 | 13.13 mM         | 21.5 mM          |
| GTP                                 | 9.38 mM          | 13.5 mM          |
| CTP                                 | 9.38 mM          | 12.5 mM          |
| 10X reaction buffer                 | 1X               | 1X               |
| 10X enzyme mix                      | 1X               | 1X               |
| RNase inhibitor,<br>Murine          | 1 U/ $\mu$ L     | 1 U/ $\mu$ L     |
| Pyrophosphatase,<br>inorganic yeast | 0.002 U/ $\mu$ L | 0.002 U/ $\mu$ L |

### Supplementary method 2: peptide pool preparation and purification

#### *Peptide pool preparation*

Dissolve 40  $\mu$ g of SARS-CoV-2 Spike S1+S2 ECD His recombinant protein (Sino Biological, China), S2 ECD-His Recombinant Protein (Sino Biological, China), and RBD-His Recombinant Protein (Sino Biological, China) in 50mM ammonium bicarbonate (Wako Pure Chemicals Industries Ltd., Japan), pH 8 containing 8M urea (ThermoFisher Scientific, USA). After dissolving, add 500 mM DTT (ThermoFisher Scientific, USA) to the solution to a final concentration of 20 mM (1:25 dilution) and mix briefly; incubate at 60 °C for 1 hour. For alkylation, add 1M IAA (Sigma-Aldrich, USA) solution to the reduced protein sample to a final concentration of 40 mM (1:25 dilution); incubate the reaction mixture for 30 minutes protected from light. To stop the reaction, add 500 mM DTT solution to a final concentration of 10 mM (1:50 dilution). To digest, add trypsin (ThermoFisher Scientific, USA) solution to the sample solution to a final trypsin to protein ratio of 1:23 (w/w). Incubate the sample tube at 37 °C for 16 – 24 hours. After incubation, to stop digestion, add formic acid to lower pH 2.0.

## Supplementary Documents

### *Peptide pool purification*

Tapping C18 spin column (ThermoFisher Scientific, USA) to settle resin. Place column into a receiver tube. To activate the column, add 200  $\mu$ L 50% acetonitrile (Wako Pure Chemicals Industries Ltd., Japan) to wet resin. Centrifuge the column at  $1500 \times g$  for 1 minute. Repeat the step. To equilibrate, add 200  $\mu$ L 0.5% formic acid (Wako Pure Chemicals Industries Ltd., Japan) in 5% acetonitrile (Wako Pure Chemicals Industries Ltd., Japan). Centrifuge the column at  $1500 \times g$  for 1 minute. Repeat the step. Load sample on top of resin bed. Place column into a receiver tube. Centrifuge the column at  $1500 \times g$  for 1 minute. To ensure complete binding, recover flow-through and repeat the step 2 – 3 times. To wash the column, Place column into a receiver tube. Add 200  $\mu$ L 0.5% formic acid in 5% acetonitrile to column. Centrifuge the column at  $1500 \times g$  for 1 minute. Repeat the step. To recover sample, place column in a new receiver tube. Add 20  $\mu$ L 70% acetonitrile to top of the resin bed. Centrifuge at  $1500 \times g$  for 1 minute. Repeat the step in same receiver tube.

### **Supplementary method 3:** Mouse splenocyte isolation

RPMI complete media (RPMI + L-glutamine + penicillin streptomycin + mouse sera) was prepared first. Then a 100 mm petri dish was taken, 10 mL complete media was added and harvested spleen was taken into the dish. By using microscopic glass slides, spleen was smashed into pieces within the petri dish. Cells were washed out from slides using micropipette. A 10 ml pipette was used to draw the solution up and down, each time closing the end of the pipette against the bottom of the petri dish – to forcefully expel the contents and break up the pieces. Cell solution was passed through a sterile 40  $\mu$ m mesh strainer. Centrifugation was performed for 10 minutes at 250  $\times g$ , at 4  $^{\circ}$ C. Supernatant discarded and cells were re-suspended in RBC(1X) lysing buffer (10X RBC lysis buffer:  $\text{NH}_4\text{Cl}$  - 4.01 gm,  $\text{NaHCO}_3$  - 0.42 gm, EDTA - 0.19 gm, pH adjusted to 7.4 using NaOH, volume adjusted to 50 ml with water. Filter sterilize and store at 4  $^{\circ}$ C for six months.) and incubated at room temp for 3-5 mins. Vigorous shaking was performed at 1 minute intervals. Again centrifugation was performed for 10 minutes at 250  $\times g$ , at 4  $^{\circ}$ C. Supernatant discarded and cells were resuspended in PBS, following centrifugation and supernatant discard. PBS washing step was repeated again. Finally, re-suspension of cell pellet in 3 ml RPMI complete media, plating in a 6-well culture plate and incubate at 37 $^{\circ}$ C, 5%  $\text{CO}_2$  as needed.
